# Supplementary material for: Soluble PD-L1 as an early marker of progressive disease on nivolumab
Source: J Immunother Cancer. 2022 Feb 7;10(2):e003527. doi: 10.1136/jitc-2021-003527 (PMC8823247; doi:10.1136/jitc-2021-003527)
Supplement: Supplementary data [file jitc-2021-003527supp001.xlsx]

## Sheet: TS1_sPDL1values
Dataset	Affymetrix data availability	Genomic Data Availability	Patient	RunID	PDL1_Av_Day1	PDL1_Av_Day29	PDL1_Av_Day43	PDL1_Av_Day63	PDL1_DIFF_Day29	PDL1_DIFF_Day43	PDL1_DIFF_Day63	ULOQ_FLAG_Day1	ULOQ_FLAG_Day29	ULOQ_FLAG_Day43	ULOQ_FLAG_Day63	QC_FLAG_Day1	QC_FLAG_Day29	QC_FLAG_Day43	QC_FLAG_Day63	sPDL1_tertile_Baseline	sPDL1_tertile_Day29	sPDL1_tertile_Day43_63	sPDL1_medianDIFF_Day1Day29	sPDL1_medianDIFF_Day1Day43_63	PriorTherapyGroup	ARM	BOR	BOR3	OS	PFS	OS_CNSR	PFS_CNSR	TPSbaseline	TPScat	MPCT	MPCTrank	OR_group	OR_num
CM9	Affy_at_Screen	No_WES	66	4	15845.7	17060.7	NA	15823.3	NA	NA	NA	1	1	NA	1	0	0	NA	0	high	high	high	NA	NA	Pretreated	BMS 2 mg/kg	PD	PD	470	36	0	0	0	0	37.8378	78	NonResponder	0
CM9	Affy_at_Screen_and_Day29	No_WES	72	1	15845.7	17060.7	NA	15823.3	NA	NA	NA	1	1	NA	1	0	0	NA	0	high	high	high	NA	NA	Pretreated	BMS 10 mg/kg	PD	PD	283	43	0	0	5	5+%	6.41711	53	NonResponder	0
CM9	Affy_at_Screen	No_WES	74	4	15845.7	17060.7	NA	15823.3	NA	NA	NA	1	1	NA	1	1	1	NA	1	high	high	high	NA	NA	Pretreated	BMS 0.3 mg/kg	SD	SD	440	163	0	0	0	0	3.68421	47	NonResponder	0
CM9	Affy_at_Screen_and_Day29	No_WES	54	2	15845.7	17060.7	NA	15823.3	NA	NA	NA	1	1	NA	1	0	0	NA	0	high	high	high	NA	NA	Pretreated	BMS 0.3 mg/kg	SD	SD	976	254	1	0	5	5+%	7.77202	55	NonResponder	0
CM9	Affy_at_Screen_and_Day29	No_WES	47	4	14270.1	17060.7	NA	15823.3	NA	NA	NA	0	1	NA	1	0	0	NA	0	high	high	high	NA	NA	Pretreated	BMS 0.3 mg/kg	SD	SD	1003	499	1	0	0	0	-43.8202	15	Responder	1
CM9	Affy_at_Screen_and_Day29	WES_sample	96	7	13470.9	12907.8	NA	12418.5	-563.11	NA	-1052.4	0	0	NA	0	0	0	NA	0	high	high	high	BelowMedian	BelowMedian	Pretreated	BMS 2 mg/kg	PD	PD	582	37	1	0	5	5+%	12.3894	64	NonResponder	0
CM9	Affy_at_Screen_and_Day29	WES_sample	21	3	11966.7	11541	NA	NA	-425.718	NA	NA	0	0	NA	NA	0	0	NA	NA	high	high	NA	BelowMedian	NA	Pretreated	BMS 10 mg/kg	SD	SD	349	43	1	1	7	5+%	-12.5984	23	NonResponder	0
CM9	Affy_at_Screen	WES_sample	22	3	10624	8680.21	NA	7785.09	-1943.83	NA	-2838.95	0	0	NA	0	0	0	NA	0	high	high	high	BelowMedian	BelowMedian	Pretreated	BMS 2 mg/kg	PR	CRPR	197	197	0	0	30	5+%	-48.9583	13	Responder	1
CM9	Affy_at_Screen	No_WES	51	6	10011.7	11052.3	NA	11025.3	1040.66	NA	1013.57	0	0	NA	0	0	0	NA	0	high	high	high	AboveMedian	AboveMedian	Naive	BMS 10 mg/kg-N	PD	PD	967	39	1	0	0	0	11.7647	63	NonResponder	0
CM9	Affy_at_Day29	WES_sample	12	5	9062.16	7712.85	NA	NA	-1349.32	NA	NA	0	0	NA	NA	0	0	NA	NA	high	high	NA	BelowMedian	NA	Pretreated	BMS 10 mg/kg	NE	NE	179	1	0	1	NA	NA	NA	90	NonResponder	0
CM9	Affy_at_Screen_and_Day29	WES_sample	50	3	8930.08	8947.59	NA	6968.9	17.5084	NA	-1961.19	0	0	NA	0	0	0	NA	0	high	high	high	BelowMedian	BelowMedian	Naive	BMS 10 mg/kg-N	SD	SD	982	86	1	0	9	5+%	-67.0103	6	Responder	1
CM9	Affy_at_Day29	WES_sample	114	2	8719.96	9331.61	NA	9523.86	611.658	NA	803.902	0	0	NA	0	0	1	NA	0	high	high	high	AboveMedian	AboveMedian	Pretreated	BMS 0.3 mg/kg	PR	CRPR	340	208	1	0	0	0	-51.3158	11	Responder	1
CM9	Affy_at_Screen_and_Day29	No_WES	81	8	8485.67	7682.01	NA	9439.36	-803.66	NA	953.69	0	0	NA	0	0	1	NA	1	high	high	high	BelowMedian	AboveMedian	Pretreated	BMS 10 mg/kg	SD	SD	912	548	1	0	NA	NA	-28.125	19	Responder	1
CM9	No_Affy_Data	No_WES	88	5	7268.21	6342.28	NA	5958.39	-925.926	NA	-1309.81	0	0	NA	0	0	0	NA	0	high	high	high	BelowMedian	BelowMedian	Pretreated	BMS 10 mg/kg	PR	CRPR	878	878	1	1	15	5+%	-79.8077	4	Responder	1
CM9	Affy_at_Screen	No_WES	100	4	6555.35	15715	NA	15823.3	9159.6	NA	NA	0	0	NA	1	0	1	NA	1	high	high	high	AboveMedian	NA	Pretreated	BMS 2 mg/kg	SD	SD	798	184	1	1	0	0	5.22388	51	NonResponder	0
CM9	Affy_at_Day29	No_WES	3	2	4789.47	3416.72	NA	NA	-1372.76	NA	NA	0	0	NA	NA	0	0	NA	NA	high	high	NA	BelowMedian	NA	Pretreated	BMS 10 mg/kg	PD	PD	43	37	1	0	NA	NA	63.6986	82	NonResponder	0
CM9	Affy_at_Screen	WES_sample	39	4	4707.49	5119.18	NA	4820.31	411.687	NA	112.814	0	0	NA	0	1	0	NA	0	high	high	high	AboveMedian	BelowMedian	Pretreated	BMS 0.3 mg/kg	PD	PD	306	37	0	0	2	1to5%	12.5	65	NonResponder	0
CM9	No_Affy_Data	WES_sample	18	3	4705.53	5184.18	NA	5482.79	478.652	NA	777.26	0	0	NA	0	0	0	NA	0	high	high	high	AboveMedian	AboveMedian	Pretreated	BMS 0.3 mg/kg	PD	PD	111	43	1	0	NA	NA	64.5161	83	NonResponder	0
CM9	Affy_at_Day29	No_WES	118	1	4597.86	4904.21	NA	4740.92	306.356	NA	143.065	0	0	NA	0	0	0	NA	1	high	high	high	AboveMedian	AboveMedian	Pretreated	BMS 0.3 mg/kg	PD	PD	177	86	0	0	2	1to5%	28.8889	75	NonResponder	0
CM9	Affy_at_Screen_and_Day29	WES_sample	28	3	4533.22	5484.64	NA	NA	951.421	NA	NA	0	0	NA	NA	0	0	NA	NA	high	high	NA	AboveMedian	NA	Naive	BMS 10 mg/kg-N	PD	PD	43	43	1	0	3	1to5%	29.5238	76	NonResponder	0
CM9	Affy_at_Screen_and_Day29	WES_sample	41	3	3948.56	3668.2	NA	4056	-280.362	NA	107.438	0	0	NA	0	0	0	NA	0	high	high	high	BelowMedian	BelowMedian	Pretreated	BMS 10 mg/kg	PD	PD	195	42	1	0	2	1to5%	9.7561	60	NonResponder	0
CM9	No_Affy_Data	No_WES	89	7	3811.49	4350.89	NA	3650.96	539.401	NA	-160.525	0	0	NA	0	0	0	NA	0	high	high	high	AboveMedian	BelowMedian	Pretreated	BMS 2 mg/kg	SD	SD	293	237	0	0	0	0	-21.0526	20	Responder	1
CM9	Affy_at_Screen	WES_sample	68	2	3701.46	4611.3	NA	NA	909.846	NA	NA	0	0	NA	NA	0	0	NA	NA	high	high	NA	AboveMedian	NA	Pretreated	BMS 0.3 mg/kg	PD	PD	740	39	0	0	0	0	-3.57143	31	NonResponder	0
CM9	Affy_at_Screen_and_Day29	WES_sample	102	2	3633.23	3401.57	NA	NA	-231.658	NA	NA	0	0	NA	NA	0	0	NA	NA	high	med	NA	BelowMedian	NA	Pretreated	BMS 0.3 mg/kg	SD	SD	165	108	1	0	0	0	3.0303	43	NonResponder	0
CM9	No_Affy_Data	WES_sample	58	1	3566.01	2643.82	NA	2379.08	-922.183	NA	-1186.93	0	0	NA	0	0	0	NA	0	high	med	med	BelowMedian	BelowMedian	Pretreated	BMS 2 mg/kg	PR	CRPR	988	687	1	1	99	5+%	-50.3497	12	Responder	1
CM9	No_Affy_Data	No_WES	4	2	3492.41	3793.16	NA	3579.61	300.748	NA	87.1995	0	0	NA	0	1	0	NA	0	high	high	high	AboveMedian	BelowMedian	Pretreated	BMS 2 mg/kg	SD	SD	914	220	1	0	0	0	4.69799	49	NonResponder	0
CM9	Affy_at_Day29	WES_sample	43	1	3489.68	3398.33	NA	4030.76	-91.357	NA	541.079	0	0	NA	0	0	0	NA	0	high	med	high	BelowMedian	AboveMedian	Naive	BMS 10 mg/kg-N	PD	PD	968	44	1	0	0	0	-8.19672	28	NonResponder	0
CM9	Affy_at_Screen_and_Day29	WES_sample	119	5	3362.18	3677.34	NA	3600.19	315.159	NA	238.016	0	0	NA	0	0	0	NA	1	high	high	high	AboveMedian	AboveMedian	Pretreated	BMS 10 mg/kg	PR	CRPR	773	414	1	0	0	0	-57.5916	10	Responder	1
CM9	Affy_at_Screen_and_Day29	WES_sample	6	3	3151.29	3888.85	NA	4494.36	737.564	NA	1343.08	0	0	NA	0	0	0	NA	0	high	high	high	AboveMedian	AboveMedian	Naive	BMS 10 mg/kg-N	SD	SD	155	99	0	0	NA	NA	-19.0476	21	Responder	1
CM9	Affy_at_Screen_and_Day29	WES_sample	25	6	3145.56	3809.59	NA	3365.55	664.024	NA	219.987	0	0	NA	0	0	0	NA	1	high	high	med	AboveMedian	AboveMedian	Naive	BMS 10 mg/kg-N	PD	PD	167	39	0	0	NA	NA	16.2896	67	NonResponder	0
CM9	Affy_at_Day29	No_WES	98	7	3138.17	3397.21	NA	3468.14	259.045	NA	329.979	0	0	NA	0	0	0	NA	0	high	med	high	AboveMedian	AboveMedian	Pretreated	BMS 0.3 mg/kg	PD	PD	398	32	0	0	0	0	-48.659	92	NonResponder	0
CM9	No_Affy_Data	No_WES	111	7	3063.71	3725.61	NA	3441.91	661.904	NA	378.206	0	0	NA	0	0	0	NA	0	med	high	high	AboveMedian	AboveMedian	Naive	BMS 10 mg/kg-N	SD	SD	834	374	1	0	0	0	-2.94118	32	NonResponder	0
CM9	Affy_at_Screen	No_WES	59	7	2851.44	2713.22	NA	2547.07	-138.221	NA	-304.371	0	0	NA	0	0	0	NA	0	med	med	med	BelowMedian	BelowMedian	Pretreated	BMS 0.3 mg/kg	SD	SD	991	81	1	0	16	5+%	7.57576	54	NonResponder	0
CM9	Affy_at_Screen_and_Day29	WES_sample	40	6	2420.7	3051.8	NA	3011.53	631.098	NA	590.833	0	0	NA	0	0	0	NA	0	med	med	med	AboveMedian	AboveMedian	Naive	BMS 10 mg/kg-N	PD	PD	974	80	1	0	6	5+%	7.85714	56	NonResponder	0
CM9	No_Affy_Data	WES_sample	95	2	2411.38	2626.36	NA	NA	214.981	NA	NA	0	0	NA	NA	0	0	NA	NA	med	med	NA	AboveMedian	NA	Pretreated	BMS 2 mg/kg	PD	PD	92	36	0	0	20	5+%	47.0588	79	NonResponder	0
CM9	Affy_at_Screen_and_Day29	No_WES	87	7	2389.13	2368.74	NA	2172.77	-20.3851	NA	-216.357	0	0	NA	0	0	0	NA	0	med	med	med	BelowMedian	BelowMedian	Pretreated	BMS 2 mg/kg	SD	SD	350	75	1	0	5	5+%	18.8235	71	NonResponder	0
CM9	Affy_at_Screen_and_Day29	WES_sample	45	4	2337.75	2721.58	NA	2258.65	383.825	NA	-79.1005	0	0	NA	0	1	0	NA	0	med	med	med	AboveMedian	BelowMedian	Naive	BMS 10 mg/kg-N	CR	CRPR	953	949	1	1	10	5+%	-85.7143	3	Responder	1
CM9	Affy_at_Screen	WES_sample	2	2	2282.8	NA	NA	NA	NA	NA	NA	0	NA	NA	NA	0	NA	NA	NA	med	NA	NA	NA	NA	Pretreated	BMS 0.3 mg/kg	NE	NE	31	31	0	0	0	0	NA	86	NA	NA
CM9	Affy_at_Screen	WES_sample	99	4	2216.36	NA	NA	NA	NA	NA	NA	0	NA	NA	NA	0	NA	NA	NA	med	NA	NA	NA	NA	Pretreated	BMS 2 mg/kg	NE	NE	41	41	0	0	6	5+%	NA	89	NA	NA
CM9	Affy_at_Screen_and_Day29	WES_sample	90	6	2209.77	2067.05	NA	1960.88	-142.725	NA	-248.895	0	0	NA	0	0	0	NA	1	med	med	med	BelowMedian	BelowMedian	Pretreated	BMS 0.3 mg/kg	PD	PD	499	36	0	0	85	5+%	57.377	81	NonResponder	0
CM9	Affy_at_Screen_and_Day29	No_WES	86	1	2124.2	2543.39	NA	3180.72	419.195	NA	1056.52	0	0	NA	0	0	0	NA	0	med	med	med	AboveMedian	AboveMedian	Pretreated	BMS 10 mg/kg	SD	SD	464	85	0	0	0	0	5.07246	50	NonResponder	0
CM9	Affy_at_Screen_and_Day29	No_WES	107	7	2066.66	2126.19	NA	2169.59	59.5282	NA	102.929	0	0	NA	0	0	0	NA	0	med	med	med	BelowMedian	BelowMedian	Pretreated	BMS 10 mg/kg	SD	SD	817	529	1	0	1	1to5%	1.93548	41	NonResponder	0
CM9	No_Affy_Data	WES_sample	97	5	2056.72	2241.73	NA	2285.33	185.001	NA	228.606	0	0	NA	0	1	1	NA	0	med	med	med	AboveMedian	AboveMedian	Pretreated	BMS 2 mg/kg	PD	PD	871	37	1	0	0	0	22.2222	72	NonResponder	0
CM9	Affy_at_Screen_and_Day29	No_WES	112	5	2017.61	2357.44	NA	2187.39	339.828	NA	169.786	0	0	NA	0	0	0	NA	0	med	med	med	AboveMedian	AboveMedian	Pretreated	BMS 10 mg/kg	SD	SD	772	171	0	0	2	1to5%	16.6667	69	NonResponder	0
CM9	Affy_at_Screen_and_Day29	WES_sample	17	3	1981.82	2161.78	NA	2179.06	179.967	NA	197.244	0	0	NA	0	0	0	NA	0	med	med	med	AboveMedian	AboveMedian	Naive	BMS 10 mg/kg-N	SD	SD	169	169	1	0	NA	NA	-4.41176	30	NonResponder	0
CM9	Affy_at_Screen_and_Day29	No_WES	71	6	1977.69	1998.56	NA	1795.32	20.8729	NA	-182.367	0	0	NA	0	0	0	NA	0	med	med	med	BelowMedian	BelowMedian	Pretreated	BMS 0.3 mg/kg	SD	SD	954	123	1	0	0	0	11.7647	62	NonResponder	0
CM9	Affy_at_Screen_and_Day29	WES_sample	27	4	1910	2199.51	NA	NA	289.502	NA	NA	0	0	NA	NA	1	1	NA	NA	med	med	NA	AboveMedian	NA	Pretreated	BMS 0.3 mg/kg	PD	PD	968	35	1	0	3	1to5%	36.4865	77	NonResponder	0
CM9	Affy_at_Screen_and_Day29	No_WES	75	7	1885.34	1933.66	NA	1865.62	48.3206	NA	-19.7226	0	0	NA	0	0	0	NA	0	med	med	med	BelowMedian	BelowMedian	Pretreated	BMS 2 mg/kg	SD	SD	821	295	0	1	0	0	-9.74359	26	NonResponder	0
CM9	Affy_at_Day29	No_WES	80	7	1870.84	2195.84	NA	2011.65	325	NA	140.808	0	0	NA	0	0	0	NA	0	med	med	med	AboveMedian	AboveMedian	Pretreated	BMS 0.3 mg/kg	SD	SD	147	82	0	0	NA	NA	3.63636	46	NonResponder	0
CM9	Affy_at_Screen_and_Day29	No_WES	83	8	1861.66	2380.16	NA	NA	518.496	NA	NA	0	0	NA	NA	0	0	NA	NA	med	med	NA	AboveMedian	NA	Pretreated	BMS 0.3 mg/kg	PD	PD	486	45	0	0	0	0	24.3243	73	NonResponder	0
CM9	Affy_at_Screen_and_Day29	WES_sample	93	6	1781.12	3668.79	NA	NA	1887.67	NA	NA	0	0	NA	NA	0	0	NA	NA	med	high	NA	AboveMedian	NA	Pretreated	BMS 10 mg/kg	PR	CRPR	684	500	0	0	1	1to5%	-43.3476	16	Responder	1
CM9	No_Affy_Data	No_WES	42	1	1760.04	NA	NA	NA	NA	NA	NA	0	NA	NA	NA	0	NA	NA	NA	med	NA	NA	NA	NA	Pretreated	BMS 0.3 mg/kg	NE	NE	81	81	0	0	5	5+%	NA	84	NA	NA
CM9	No_Affy_Data	WES_sample	56	6	1747.6	2069.99	NA	3137.51	322.394	NA	1389.91	0	0	NA	0	0	0	NA	0	med	med	med	AboveMedian	AboveMedian	Pretreated	BMS 2 mg/kg	SD	SD	992	81	1	0	0	0	17.3469	70	NonResponder	0
CM9	No_Affy_Data	WES_sample	24	5	1739.41	2144.17	NA	NA	404.754	NA	NA	0	0	NA	NA	0	0	NA	NA	med	med	NA	AboveMedian	NA	Naive	BMS 10 mg/kg-N	PD	PD	62	51	0	0	0	0	5.88235	52	NonResponder	0
CM9	No_Affy_Data	WES_sample	26	2	1666.35	NA	NA	NA	NA	NA	NA	0	NA	NA	NA	0	NA	NA	NA	med	NA	NA	NA	NA	Pretreated	BMS 2 mg/kg	NE	NE	33	28	0	0	9	5+%	NA	85	NA	NA
CM9	No_Affy_Data	WES_sample	62	1	1632.99	1758.96	NA	1824.93	125.974	NA	191.943	0	0	NA	0	0	0	NA	0	med	med	med	BelowMedian	AboveMedian	Pretreated	BMS 10 mg/kg	SD	SD	106	87	1	0	NA	NA	4	48	NonResponder	0
CM9	Affy_at_Screen_and_Day29	WES_sample	10	5	1601.8	1757.22	NA	1786.72	155.414	NA	184.917	0	0	NA	0	0	0	NA	1	med	low	med	BelowMedian	AboveMedian	Naive	BMS 10 mg/kg-N	SD	SD	1058	173	1	1	3	1to5%	0	36	NonResponder	0
CM9	Affy_at_Day29	WES_sample	29	3	1590.99	2478.52	NA	1941.32	887.531	NA	350.336	0	0	NA	0	0	0	NA	0	med	med	med	AboveMedian	AboveMedian	Pretreated	BMS 0.3 mg/kg	NE	NE	937	1	1	1	NA	NA	NA	87	NonResponder	0
CM9	No_Affy_Data	No_WES	48	1	1576.15	1925.21	NA	2976.35	349.052	NA	1400.19	0	0	NA	0	0	0	NA	0	med	med	med	AboveMedian	AboveMedian	Pretreated	BMS 2 mg/kg	SD	SD	983	983	1	1	0	0	-2.91262	33	NonResponder	0
CM9	Affy_at_Screen_and_Day29	WES_sample	73	3	1550.11	1776.12	NA	1835.33	226.005	NA	285.22	0	0	NA	0	0	0	NA	0	med	med	med	AboveMedian	AboveMedian	Pretreated	BMS 2 mg/kg	PD	PD	178	58	0	0	0	0	11.0092	61	NonResponder	0
CM9	Affy_at_Screen_and_Day29	WES_sample	105	4	1511.16	1707.55	NA	NA	196.385	NA	NA	0	0	NA	NA	0	0	NA	NA	med	low	NA	AboveMedian	NA	Pretreated	BMS 10 mg/kg	PD	PD	118	45	0	0	0	0	16.6667	68	NonResponder	0
CM9	No_Affy_Data	WES_sample	8	5	1489.11	1538.28	NA	1171.69	49.167	NA	-317.428	0	0	NA	0	0	0	NA	0	low	low	low	BelowMedian	BelowMedian	Pretreated	BMS 0.3 mg/kg	PR	CRPR	1051	292	1	0	3	1to5%	-72.7273	5	Responder	1
CM9	Affy_at_Screen_and_Day29	No_WES	69	7	1482.53	1685.8	NA	NA	203.27	NA	NA	0	0	NA	NA	0	0	NA	NA	low	low	NA	AboveMedian	NA	Pretreated	BMS 10 mg/kg	PD	PD	303	37	0	0	0	0	53.3333	80	NonResponder	0
CM9	Affy_at_Screen	WES_sample	84	1	1466.18	1675.12	NA	1600.62	208.938	NA	134.441	0	0	NA	0	0	0	NA	0	low	low	low	AboveMedian	AboveMedian	Pretreated	BMS 0.3 mg/kg	SD	SD	680	88	0	0	0	0	8.33333	57	NonResponder	0
CM9	Affy_at_Screen	WES_sample	64	1	1457.95	1391.91	NA	1131.78	-66.0346	NA	-326.169	0	0	NA	0	1	0	NA	0	low	low	low	BelowMedian	BelowMedian	Pretreated	BMS 10 mg/kg	SD	SD	766	157	0	1	0	0	2	42	NonResponder	0
CM9	No_Affy_Data	No_WES	57	6	1451.92	1473.55	NA	1393.92	21.6248	NA	-57.9978	0	0	NA	0	0	0	NA	0	low	low	low	BelowMedian	BelowMedian	Pretreated	BMS 10 mg/kg	SD	SD	969	295	1	0	5	5+%	0	39	NonResponder	0
CM9	Affy_at_Screen_and_Day29	No_WES	77	8	1432.63	1630.96	NA	NA	198.329	NA	NA	0	0	NA	NA	0	0	NA	NA	low	low	NA	AboveMedian	NA	Pretreated	BMS 0.3 mg/kg	PD	PD	132	44	0	0	4	1to5%	0.819672	40	NonResponder	0
CM9	Affy_at_Day29	WES_sample	85	2	1431.34	1516.75	NA	NA	85.4033	NA	NA	0	0	NA	NA	0	0	NA	NA	low	low	NA	BelowMedian	NA	Pretreated	BMS 2 mg/kg	SD	SD	712	42	0	1	0	0	-11.7647	24	NonResponder	0
CM9	No_Affy_Data	No_WES	76	8	1428.73	1462.8	NA	1432.7	34.0705	NA	3.96985	0	0	NA	0	0	0	NA	0	low	low	low	BelowMedian	BelowMedian	Pretreated	BMS 10 mg/kg	PR	CRPR	662	209	0	0	1	1to5%	-58.7302	9	Responder	1
CM9	Affy_at_Screen_and_Day29	WES_sample	20	1	1415.92	1376.97	NA	1692.17	-38.9532	NA	276.255	0	0	NA	0	0	0	NA	0	low	low	low	BelowMedian	AboveMedian	Naive	BMS 10 mg/kg-N	CR	CRPR	1065	1022	1	1	0	0	-100	1	Responder	1
CM9	Affy_at_Screen	No_WES	30	4	1412.65	1407.26	NA	1329.5	-5.39431	NA	-83.1558	0	0	NA	0	0	0	NA	0	low	low	low	BelowMedian	BelowMedian	Pretreated	BMS 10 mg/kg	PR	CRPR	365	246	0	0	1	1to5%	-36.5854	17	Responder	1
CM9	No_Affy_Data	No_WES	63	3	1301.53	NA	NA	NA	NA	NA	NA	0	NA	NA	NA	0	NA	NA	NA	low	NA	NA	NA	NA	Pretreated	BMS 2 mg/kg	NE	NE	189	22	1	0	6	5+%	NA	88	NA	NA
CM9	Affy_at_Screen_and_Day29	WES_sample	1	2	1294.09	1785.35	NA	NA	491.263	NA	NA	0	0	NA	NA	0	0	NA	NA	low	med	NA	AboveMedian	NA	Pretreated	BMS 10 mg/kg	PD	PD	43	38	1	0	0	0	24.3421	74	NonResponder	0
CM9	Affy_at_Screen_and_Day29	WES_sample	52	4	1292.25	NA	NA	1389.43	NA	NA	97.1739	0	NA	NA	0	0	NA	NA	0	low	NA	low	NA	BelowMedian	Naive	BMS 10 mg/kg-N	SD	SD	995	246	1	0	0	0	-4.82759	29	NonResponder	0
CM9	Affy_at_Screen_and_Day29	No_WES	34	4	1288.82	914.695	NA	1081.69	-374.123	NA	-207.132	0	0	NA	0	0	0	NA	0	low	low	low	BelowMedian	BelowMedian	Pretreated	BMS 2 mg/kg	PR	CRPR	957	500	1	0	5	5+%	-59.322	8	Responder	1
CM9	Affy_at_Screen	No_WES	36	6	1275.54	NA	NA	NA	NA	NA	NA	0	NA	NA	NA	0	NA	NA	NA	low	NA	NA	NA	NA	Naive	BMS 10 mg/kg-N	NE	NE	741	1	0	1	NA	NA	NA	91	NA	NA
CM9	Affy_at_Screen_and_Day29	WES_sample	117	2	1246.1	1242.1	NA	1593.53	-4.00372	NA	347.429	0	0	NA	0	1	0	NA	0	low	low	low	BelowMedian	AboveMedian	Naive	BMS 10 mg/kg-N	SD	SD	64	38	1	1	2	1to5%	-10.1266	25	NonResponder	0
CM9	Affy_at_Screen_and_Day29	WES_sample	15	2	1238.71	1285.71	NA	1447.63	47.0041	NA	208.927	0	0	NA	0	0	0	NA	0	low	low	low	BelowMedian	AboveMedian	Naive	BMS 10 mg/kg-N	SD	SD	1013	663	0	0	0	0	-9.52381	27	NonResponder	0
CM9	Affy_at_Day29	WES_sample	103	7	1235.55	1262.19	NA	1207.65	26.6381	NA	-27.9043	0	0	NA	0	0	0	NA	0	low	low	low	BelowMedian	BelowMedian	Pretreated	BMS 10 mg/kg	SD	SD	862	289	1	0	NA	NA	3.57143	45	NonResponder	0
CM9	Affy_at_Day29	No_WES	94	8	1229.81	1297.63	NA	1475.51	67.815	NA	245.696	0	0	NA	0	0	1	NA	0	low	low	low	BelowMedian	AboveMedian	Pretreated	BMS 10 mg/kg	SD	SD	912	463	1	0	9	5+%	-30.9859	18	Responder	1
CM9	Affy_at_Screen_and_Day29	WES_sample	11	5	1178.81	1215.73	NA	1178.33	36.9275	NA	-0.47217	0	0	NA	0	0	0	NA	0	low	low	low	BelowMedian	BelowMedian	Naive	BMS 10 mg/kg-N	SD	SD	1024	122	1	0	0	0	8.61244	58	NonResponder	0
CM9	Affy_at_Screen	WES_sample	106	4	1176.12	1585.21	NA	1108.7	409.085	NA	-67.4279	0	0	NA	0	0	0	NA	0	low	low	low	AboveMedian	BelowMedian	Pretreated	BMS 2 mg/kg	PR	CRPR	870	821	1	1	0	0	-60.6667	7	Responder	1
CM9	Affy_at_Screen_and_Day29	No_WES	49	2	1167.35	1321.3	NA	1762.32	153.946	NA	594.969	0	0	NA	0	0	0	NA	0	low	low	med	BelowMedian	AboveMedian	Pretreated	BMS 10 mg/kg	SD	SD	605	123	0	0	1	1to5%	3.33333	44	NonResponder	0
CM9	Affy_at_Day29	No_WES	13	5	1165.26	1203.26	NA	1124.08	38.0005	NA	-41.1786	0	0	NA	0	0	0	NA	0	low	low	low	BelowMedian	BelowMedian	Naive	BMS 10 mg/kg-N	SD	SD	1094	337	1	0	0	0	0	37	NonResponder	0
CM9	Affy_at_Day29	No_WES	23	3	1142.57	1263.02	NA	1256.66	120.45	NA	114.085	0	0	NA	0	0	0	NA	0	low	low	low	BelowMedian	AboveMedian	Naive	BMS 10 mg/kg-N	SD	SD	149	127	1	1	0	0	-1.92308	34	NonResponder	0
CM9	Affy_at_Screen	WES_sample	14	5	1117.84	1169.89	NA	1023.6	52.0532	NA	-94.2401	0	0	NA	0	0	1	NA	0	low	low	low	BelowMedian	BelowMedian	Naive	BMS 10 mg/kg-N	PR	CRPR	1025	541	1	0	0	0	-86.4865	2	Responder	1
CM9	No_Affy_Data	WES_sample	32	1	1097.64	1431.72	NA	1627.21	334.085	NA	529.57	0	0	NA	0	0	0	NA	0	low	low	low	AboveMedian	AboveMedian	Naive	BMS 10 mg/kg-N	SD	SD	240	213	0	1	0	0	-13.0435	22	NonResponder	0
CM9	Affy_at_Screen	WES_sample	115	6	1085.97	1338.55	NA	1124.07	252.584	NA	38.0956	0	0	NA	0	0	0	NA	0	low	low	low	AboveMedian	BelowMedian	Pretreated	BMS 2 mg/kg	SD	SD	366	87	1	0	0	0	15.2778	66	NonResponder	0
CM9	Affy_at_Screen_and_Day29	WES_sample	79	6	1072.58	1115.9	NA	1121.81	43.3118	NA	49.2303	0	0	NA	0	0	0	NA	0	low	low	low	BelowMedian	BelowMedian	Pretreated	BMS 2 mg/kg	SD	SD	873	130	1	0	0	0	8.91089	59	NonResponder	0
CM9	Affy_at_Screen_and_Day29	No_WES	38	6	913.987	1078.24	NA	933.35	164.253	NA	19.3623	0	0	NA	0	1	0	NA	0	low	low	low	BelowMedian	BelowMedian	Naive	BMS 10 mg/kg-N	PD	PD	955	39	1	0	15	5+%	0	38	NonResponder	0
CM9	Affy_at_Screen_and_Day29	No_WES	5	5	834.636	1033.64	NA	1006.65	199.006	NA	172.018	0	0	NA	0	1	0	NA	0	low	low	low	AboveMedian	AboveMedian	Naive	BMS 10 mg/kg-N	SD	SD	492	85	0	0	0	0	0	35	NonResponder	0
CM38	Affy_at_Screen_and_Day29		47	10	18016.6	17228.6	14960	NA	NA	NA	NA	1	1	1	NA	1	1	1	NA	high	high	high	NA	NA	NIV3-PROG	Nivo	PD	PD	23.5893	1.87269	0	0	5	5+%	58.0645	146	NonResponder	0
CM38	Affy_at_Screen_and_Day29		59	11	18016.6	17228.6	14960	NA	NA	NA	NA	1	1	1	NA	1	1	1	NA	high	high	high	NA	NA	NIV3-NAIVE	Nivo	SD	SD	23.2608	3.64682	0	0	30	5+%	-12.3288	84	NonResponder	0
CM38	Affy_at_Screen_and_Day29		89	13	18016.6	17228.6	14960	NA	NA	NA	NA	1	1	1	NA	0	0	1	NA	high	high	high	NA	NA	NIV3-NAIVE	Nivo	SD	SD	27.729	7.19507	0	0	NA	NA	-18.1818	76	NonResponder	0
CM38	Affy_at_Screen_and_Day29		82	13	18016.6	17228.6	14960	NA	NA	NA	NA	1	1	1	NA	0	0	0	NA	high	high	high	NA	NA	NIV3-PROG	Nivo	SD	SD	14.0945	7.22793	0	0	0	0	-4.60526	89	NonResponder	0
CM38	Affy_at_Screen_and_Day29		30	9	18016.6	17228.6	14960	NA	NA	NA	NA	1	1	1	NA	1	1	1	NA	high	high	high	NA	NA	NIV3-NAIVE	Nivo	CR	CRPR	34.5955	19.8111	1	0	NA	NA	-78.125	31	Responder	1
CM38	Affy_at_Screen_and_Day29		94	14	18016.6	17228.6	14960	NA	NA	NA	NA	1	1	1	NA	0	0	0	NA	high	high	high	NA	NA	NIV3-NAIVE	Nivo	CR	CRPR	38.2094	23.9507	1	1	0	0	-100	14	Responder	1
CM38	No_Affy_Data		86	13	15393.7	13877.7	11214.1	NA	-1516	-4179.59	NA	0	0	0	NA	1	1	0	NA	high	high	high	BelowMedian	BelowMedian	NIV3-PROG	Nivo	PD	PD	8.93634	2.52977	0	0	0	0	-40.6844	64	NonResponder	0
CM38	Affy_at_Screen_and_Day29		28	9	12252.7	11118.2	NA	NA	-1134.52	NA	NA	0	0	NA	NA	0	0	NA	NA	high	high	NA	BelowMedian	NA	NIV3-NAIVE	Nivo	PD	PD	24.3121	3.21971	0	0	3	1to5%	3.22581	104	NonResponder	0
CM38	Affy_at_Screen		39	10	10254.6	NA	NA	NA	NA	NA	NA	0	NA	NA	NA	0	NA	NA	NA	high	NA	NA	NA	NA	NIV3-PROG	Nivo	PD	PD	5.4538	1.87269	0	0	0	0	72.8814	148	NonResponder	0
CM38	Affy_at_Day29		80	12	9486.07	5793.55	3615.91	NA	-3692.53	-5870.16	NA	0	0	0	NA	0	0	0	NA	high	high	high	BelowMedian	BelowMedian	NIV3-PROG	Nivo	PD	PD	20.1396	1.77413	0	0	NA	NA	0	98	NonResponder	0
CM38	No_Affy_Data		108	14	8990.72	8675.23	8452.65	NA	-315.485	-538.061	NA	0	0	0	NA	0	0	0	NA	high	high	high	BelowMedian	BelowMedian	NIV3-PROG	Nivo	SD	SD	36.271	18.037	1	0	0	0	2.38095	101	NonResponder	0
CM38	Affy_at_Screen_and_Day29		77	12	8134.91	8353.44	9011.94	NA	218.529	877.033	NA	0	0	0	NA	0	0	0	NA	high	high	high	AboveMedian	AboveMedian	NIV3-NAIVE	Nivo	SD	SD	15.4743	5.35524	0	0	45	5+%	-15.9091	78	NonResponder	0
CM38	No_Affy_Data		104	14	7926.65	8115.76	7201.3	NA	189.113	-725.349	NA	0	0	0	NA	0	0	0	NA	high	high	high	AboveMedian	BelowMedian	NIV3-PROG	Nivo	PR	CRPR	26.8747	24.3778	1	1	4	1to5%	-42.6966	60	Responder	1
CM38	Affy_at_Screen_and_Day29		84	13	7315.96	9085.93	8497.56	NA	1769.97	1181.6	NA	0	0	0	NA	0	0	0	NA	high	high	high	AboveMedian	AboveMedian	NIV3-NAIVE	Nivo	PD	PD	4.96099	1.64271	0	0	0	0	13.0435	118	NonResponder	0
CM38	Affy_at_Screen		90	13	6041.08	6669.99	7533.45	NA	628.901	1492.37	NA	0	0	0	NA	0	0	0	NA	high	high	high	AboveMedian	AboveMedian	NIV3-PROG	Nivo	PD	PD	5.71663	1.41273	0	0	0	0	NA	169	NonResponder	0
CM38	Affy_at_Screen_and_Day29		11	9	5371.75	4322.83	NA	NA	-1048.92	NA	NA	0	0	NA	NA	0	0	NA	NA	high	high	NA	BelowMedian	NA	NIV3-NAIVE	Nivo	PD	PD	27.499	1.9384	0	0	2	1to5%	100	152	NonResponder	0
CM38	Affy_at_Day29		68	12	5163.17	4629.68	4616.68	NA	-533.487	-546.487	NA	0	0	0	NA	0	0	1	NA	high	high	high	BelowMedian	BelowMedian	NIV3-PROG	Nivo	PR	CRPR	27.6632	24.9363	1	1	5	5+%	-73.6842	37	Responder	1
CM38	Affy_at_Screen_and_Day29		37	10	5027.62	4881.24	4986.82	NA	-146.381	-40.8003	NA	0	0	0	NA	0	0	0	NA	high	high	high	BelowMedian	BelowMedian	NIV3-PROG	Nivo	SD	SD	21.2238	5.78234	0	0	1	1to5%	0	99	NonResponder	0
CM38	Affy_at_Screen_and_Day29		98	14	4597.66	5285.44	5211.8	NA	687.783	614.144	NA	0	0	0	NA	0	0	0	NA	high	high	high	AboveMedian	AboveMedian	NIV3-PROG	Nivo	SD	SD	24.5421	13.4045	0	0	0	0	4.43038	107	NonResponder	0
CM38	No_Affy_Data		24	9	4202.29	7586.97	7026.23	NA	3384.68	2823.94	NA	0	0	0	NA	0	0	0	NA	high	high	high	AboveMedian	AboveMedian	NIV3-NAIVE	Nivo	PD	PD	4.89528	1.64271	1	0	NA	NA	3.77358	106	NonResponder	0
CM38	Affy_at_Screen_and_Day29		34	10	4162.51	3729.09	4549.6	NA	-433.422	387.091	NA	0	0	0	NA	0	0	0	NA	high	high	high	BelowMedian	AboveMedian	NIV3-PROG	Nivo	PR	CRPR	27.4004	27.4004	1	1	8	5+%	-61.9048	48	Responder	1
CM38	No_Affy_Data		76	12	3627.18	NA	NA	NA	NA	NA	NA	0	NA	NA	NA	0	NA	NA	NA	high	NA	NA	NA	NA	NIV3-NAIVE	Nivo	NE	NE	0.328542	0.328542	0	0	60	5+%	NA	164	NA	NA
CM38	Affy_at_Day29		105	14	3607.4	3314.61	2937.66	NA	-292.794	-669.736	NA	0	0	0	NA	0	0	0	NA	high	high	high	BelowMedian	BelowMedian	NIV3-PROG	Nivo	PR	CRPR	35.0226	19.2854	1	0	18	5+%	-85.3659	25	Responder	1
CM38	Affy_at_Screen_and_Day29		79	12	3434.85	3655.71	NA	NA	220.853	NA	NA	0	0	NA	NA	0	0	NA	NA	high	high	NA	AboveMedian	NA	NIV3-PROG	Nivo	SD	SD	7.16222	5.61807	0	0	4	1to5%	13.7566	119	NonResponder	0
CM38	No_Affy_Data		48	11	3370.2	1625.25	1342.95	NA	-1744.95	-2027.25	NA	0	0	0	NA	0	0	0	NA	high	low	low	BelowMedian	BelowMedian	NIV3-PROG	Nivo	CR	CRPR	55.0637	38.7351	1	1	NA	NA	-100	17	Responder	1
CM38	No_Affy_Data		74	12	3056.62	NA	NA	NA	NA	NA	NA	0	NA	NA	NA	0	NA	NA	NA	high	NA	NA	NA	NA	NIV3-NAIVE	Nivo	NE	NE	0.657084	0.657084	0	0	0	0	NA	174	NA	NA
CM38	Affy_at_Screen_and_Day29		17	9	2844.6	8124.73	NA	NA	5280.13	NA	NA	0	0	NA	NA	1	0	NA	NA	high	high	NA	AboveMedian	NA	NIV3-PROG	Nivo	PD	PD	1.87269	1.77413	0	0	0	0	21.6814	125	NonResponder	0
CM38	Affy_at_Day29		16	9	2788.21	NA	NA	NA	NA	NA	NA	0	NA	NA	NA	0	NA	NA	NA	med	NA	NA	NA	NA	NIV3-PROG	Nivo	NE	NE	1.47844	1.47844	0	0	0	0	NA	159	NA	NA
CM38	Affy_at_Day29		36	10	2708.5	2528.87	2494.12	NA	-179.635	-214.379	NA	0	0	0	NA	0	0	0	NA	med	med	med	BelowMedian	BelowMedian	NIV3-PROG	Nivo	SD	SD	35.5154	24.2136	1	1	NA	NA	-15.5462	80	NonResponder	0
CM38	Affy_at_Screen_and_Day29		106	14	2700.27	2673.82	2620.98	NA	-26.4463	-79.2903	NA	0	0	0	NA	0	0	0	NA	med	med	med	BelowMedian	BelowMedian	NIV3-PROG	Nivo	PD	PD	2.98973	1.83984	0	0	0	0	27	134	NonResponder	0
CM38	Affy_at_Screen		25	9	2693.47	NA	NA	NA	NA	NA	NA	0	NA	NA	NA	0	NA	NA	NA	med	NA	NA	NA	NA	NIV3-NAIVE	Nivo	PD	PD	3.31828	0.788501	0	0	0	0	34.0136	139	NonResponder	0
CM38	Affy_at_Day29		70	12	2596.13	3299.49	3314.88	NA	703.363	718.747	NA	0	0	0	NA	0	0	0	NA	med	high	high	AboveMedian	AboveMedian	NIV3-PROG	Nivo	SD	SD	10.2177	3.48255	0	1	3	1to5%	0	97	NonResponder	0
CM38	No_Affy_Data		73	12	2592.3	2780.53	2547.64	NA	188.234	-44.6591	NA	0	0	0	NA	1	0	0	NA	med	med	med	AboveMedian	BelowMedian	NIV3-NAIVE	Nivo	SD	SD	9.26489	5.51951	1	0	NA	NA	0	93	NonResponder	0
CM38	Affy_at_Screen_and_Day29		26	9	2581.58	2237.42	2148.15	NA	-344.156	-433.428	NA	0	0	0	NA	0	0	0	NA	med	med	med	BelowMedian	BelowMedian	NIV3-PROG	Nivo	SD	SD	31.2772	9.65914	1	0	4	1to5%	2.5641	102	NonResponder	0
CM38	No_Affy_Data		64	12	2565.2	3085.62	2809.77	NA	520.428	244.57	NA	0	0	0	NA	0	0	1	NA	med	med	high	AboveMedian	AboveMedian	NIV3-NAIVE	Nivo	PR	CRPR	26.9405	7.35934	1	0	NA	NA	-79.661	27	Responder	1
CM38	Affy_at_Screen_and_Day29		31	10	2554.57	2404.87	2509.65	NA	-149.697	-44.9141	NA	0	0	0	NA	1	0	0	NA	med	med	med	BelowMedian	BelowMedian	NIV3-NAIVE	Nivo	PD	PD	31.5729	1.64271	1	0	NA	NA	27.451	135	NonResponder	0
CM38	Affy_at_Day29		46	10	2353.79	2420.03	2568.83	NA	66.2414	215.033	NA	0	0	0	NA	0	0	0	NA	med	med	med	BelowMedian	AboveMedian	NIV3-PROG	Nivo	PD	PD	7.45791	1.67556	0	0	NA	NA	55.1402	143	NonResponder	0
CM38	Affy_at_Screen		53	11	2346.02	NA	2935.12	NA	NA	589.108	NA	0	NA	0	NA	0	NA	0	NA	med	NA	high	NA	AboveMedian	NIV3-PROG	Nivo	PR	CRPR	14.2259	8.64066	0	1	NA	NA	-64.8148	45	Responder	1
CM38	Affy_at_Screen_and_Day29		2	8	2323.3	2821.11	2792	NA	497.805	468.7	NA	0	0	0	NA	0	1	0	NA	med	med	med	AboveMedian	AboveMedian	NIV3-PROG	Nivo	SD	SD	9.03491	3.77823	0	1	38	5+%	2.06897	100	NonResponder	0
CM38	Affy_at_Screen_and_Day29		92	13	2299.86	2360.71	2451.26	NA	60.8553	151.401	NA	0	0	0	NA	0	0	0	NA	med	med	med	BelowMedian	BelowMedian	NIV3-PROG	Nivo	SD	SD	10.9405	6.2423	0	0	10	5+%	-4.97512	88	NonResponder	0
CM38	No_Affy_Data		14	9	2080.77	NA	NA	NA	NA	NA	NA	0	NA	NA	NA	0	NA	NA	NA	med	NA	NA	NA	NA	NIV3-NAIVE	Nivo	PR	CRPR	23.1622	4.17248	0	1	NA	NA	-47.619	58	Responder	1
CM38	No_Affy_Data		71	12	2042.62	2064.98	2047.42	NA	22.3609	4.79808	NA	0	0	0	NA	0	0	0	NA	med	med	med	BelowMedian	BelowMedian	NIV3-NAIVE	Nivo	SD	SD	8.08214	5.78234	1	1	NA	NA	-23.2143	74	NonResponder	0
CM38	Affy_at_Screen_and_Day29		5	8	2012.84	2031.05	2052.94	NA	18.2098	40.0942	NA	0	0	0	NA	1	0	0	NA	med	med	med	BelowMedian	BelowMedian	NIV3-NAIVE	Nivo	PD	PD	7.29363	1.83984	0	0	2	1to5%	NA	173	NonResponder	0
CM38	Affy_at_Screen_and_Day29		83	13	1889.67	2298.38	2153.91	NA	408.711	264.236	NA	0	0	0	NA	0	0	0	NA	med	med	med	AboveMedian	AboveMedian	NIV3-PROG	Nivo	SD	SD	15.1786	11.5318	1	1	15	5+%	0	96	NonResponder	0
CM38	Affy_at_Screen		29	9	1879.85	2442.69	2801.98	NA	562.842	922.128	NA	0	0	0	NA	0	0	0	NA	med	med	med	AboveMedian	AboveMedian	NIV3-NAIVE	Nivo	PD	PD	8.9692	1.64271	0	0	NA	NA	25.9259	132	NonResponder	0
CM38	No_Affy_Data		9	8	1838.88	1962.92	NA	NA	124.045	NA	NA	0	0	NA	NA	0	0	NA	NA	med	med	NA	BelowMedian	NA	NIV3-NAIVE	Nivo	PD	PD	3.02259	2.16838	0	0	0	0	2.94118	103	NonResponder	0
CM38	Affy_at_Screen_and_Day29		10	8	1799.8	1936.24	1840.62	NA	136.446	40.8181	NA	0	0	0	NA	0	0	0	NA	med	med	low	BelowMedian	BelowMedian	NIV3-NAIVE	Nivo	SD	SD	8.41068	3.90965	0	0	0	0	-9.43396	86	NonResponder	0
CM38	No_Affy_Data		91	13	1790.27	2434.93	2132.59	NA	644.658	342.318	NA	0	0	0	NA	0	1	1	NA	med	med	med	AboveMedian	AboveMedian	NIV3-NAIVE	Nivo	PR	CRPR	37.3224	15.1786	1	0	NA	NA	-42.2535	61	Responder	1
CM38	Affy_at_Day29		69	12	1783.58	1969.89	2140.33	NA	186.302	356.746	NA	0	0	0	NA	0	0	1	NA	med	med	med	AboveMedian	AboveMedian	NIV3-PROG	Nivo	CR	CRPR	24.9035	12.8789	1	1	2	1to5%	-100	16	Responder	1
CM38	Affy_at_Screen_and_Day29		44	10	1776.83	1806.2	1674.92	NA	29.3663	-101.914	NA	0	0	0	NA	0	0	0	NA	med	low	low	BelowMedian	BelowMedian	NIV3-NAIVE	Nivo	PR	CRPR	42.809	18.3984	1	0	23	5+%	-100	2	Responder	1
CM38	Affy_at_Screen_and_Day29		58	11	1700.33	1609.55	1861.79	NA	-90.7829	161.458	NA	0	0	0	NA	0	0	0	NA	med	low	low	BelowMedian	BelowMedian	NIV3-PROG	Nivo	SD	SD	16.3943	3.71253	0	0	2	1to5%	-3.10559	91	NonResponder	0
CM38	Affy_at_Screen_and_Day29		87	13	1700.24	1896.22	1860.1	NA	195.982	159.865	NA	0	0	0	NA	0	0	0	NA	med	med	low	AboveMedian	BelowMedian	NIV3-NAIVE	Nivo	SD	SD	36.8296	12.9774	1	0	0	0	-55.8442	54	NonResponder	0
CM38	No_Affy_Data		32	10	1683.1	2778.28	2516.61	NA	1095.19	833.517	NA	0	0	0	NA	0	0	0	NA	low	med	med	AboveMedian	AboveMedian	NIV3-PROG	Nivo	SD	SD	3.74538	3.74538	1	0	NA	NA	12.5	117	NonResponder	0
CM38	Affy_at_Screen_and_Day29		38	10	1648.31	2187.2	2225.44	NA	538.894	577.135	NA	0	0	0	NA	0	0	0	NA	low	med	med	AboveMedian	AboveMedian	NIV3-PROG	Nivo	SD	SD	5.48665	3.28542	0	0	0	0	5.15021	108	NonResponder	0
CM38	Affy_at_Screen_and_Day29		85	13	1623.87	1799.32	1501.93	NA	175.445	-121.941	NA	0	0	0	NA	0	0	0	NA	low	low	low	AboveMedian	BelowMedian	NIV3-PROG	Nivo	PD	PD	29.7002	1.60986	1	0	0	0	56.25	145	NonResponder	0
CM38	Affy_at_Screen		66	12	1620.25	1934.04	2038.34	NA	313.796	418.098	NA	0	0	0	NA	0	0	0	NA	low	med	med	AboveMedian	AboveMedian	NIV3-NAIVE	Nivo	PD	PD	17.807	1.9384	0	0	3	1to5%	21.8182	126	NonResponder	0
CM38	No_Affy_Data		51	11	1589.01	1867.21	1883.48	NA	278.202	294.473	NA	0	0	0	NA	0	0	0	NA	low	low	med	AboveMedian	AboveMedian	NIV3-PROG	Nivo	PD	PD	1.87269	1.54415	1	0	0	0	38.4921	140	NonResponder	0
CM38	Affy_at_Screen_and_Day29		18	9	1539.81	1741.29	1402.84	NA	201.489	-136.963	NA	0	0	0	NA	0	0	0	NA	low	low	low	AboveMedian	BelowMedian	NIV3-NAIVE	Nivo	PR	CRPR	55.3922	17.0513	1	0	20	5+%	-76.3158	33	Responder	1
CM38	No_Affy_Data		54	11	1518.3	1879.45	1767.04	NA	361.151	248.744	NA	0	0	0	NA	0	0	0	NA	low	low	low	AboveMedian	AboveMedian	NIV3-PROG	Nivo	PR	CRPR	28.4189	28.4189	1	1	NA	NA	-85.7143	24	Responder	1
CM38	Affy_at_Screen		60	11	1515.73	1739.28	1877.57	NA	223.551	361.847	NA	0	0	0	NA	0	0	0	NA	low	low	med	AboveMedian	AboveMedian	NIV3-NAIVE	Nivo	PD	PD	24.2464	1.67556	1	0	0	0	NA	166	NonResponder	0
CM38	Affy_at_Day29		81	13	1495.04	NA	2256.37	NA	NA	761.335	NA	0	NA	0	NA	0	NA	0	NA	low	NA	med	NA	AboveMedian	NIV3-NAIVE	Nivo	PD	PD	15.4086	1.74127	0	0	0	0	100	153	NonResponder	0
CM38	Affy_at_Day29		35	10	1479.57	1814.05	1792.94	NA	334.484	313.372	NA	0	0	0	NA	0	0	0	NA	low	low	low	AboveMedian	AboveMedian	NIV3-NAIVE	Nivo	PR	CRPR	29.1417	26.7105	0	1	0	0	-89.3617	20	Responder	1
CM38	Affy_at_Day29		13	9	1453.08	2098.14	2237.65	NA	645.054	784.571	NA	0	0	0	NA	0	0	1	NA	low	med	med	AboveMedian	AboveMedian	NIV3-NAIVE	Nivo	PD	PD	9.19918	2.03696	0	0	7	5+%	25	129	NonResponder	0
CM38	Affy_at_Screen_and_Day29		27	9	1401.95	1569.59	1534.03	NA	167.634	132.071	NA	0	0	0	NA	0	0	0	NA	low	low	low	BelowMedian	BelowMedian	NIV3-NAIVE	Nivo	PD	PD	15.6057	1.64271	0	0	NA	NA	17.9104	122	NonResponder	0
CM38	No_Affy_Data		67	12	1373.16	1244.67	NA	NA	-128.489	NA	NA	0	0	NA	NA	0	0	NA	NA	low	low	NA	BelowMedian	NA	NIV3-PROG	Nivo	SD	SD	36.8953	9.23203	1	0	NA	NA	0	95	NonResponder	0
CM38	No_Affy_Data		100	14	1225.12	1489.88	1490.95	NA	264.765	265.832	NA	0	0	0	NA	0	0	0	NA	low	low	low	AboveMedian	AboveMedian	NIV3-PROG	Nivo	PD	PD	27.5975	1.64271	0	0	NA	NA	20	124	NonResponder	0
CM38	Affy_at_Screen_and_Day29		3	8	1200.5	1206.54	1296.32	NA	6.04868	95.8198	NA	0	0	0	NA	0	0	0	NA	low	low	low	BelowMedian	BelowMedian	NIV3-NAIVE	Nivo	PR	CRPR	43.499	19.154	0	0	0	0	-76.9841	32	Responder	1
CM38	Affy_at_Screen_and_Day29		4	8	1153.1	1371.31	1295.38	NA	218.211	142.279	NA	0	0	0	NA	0	0	0	NA	low	low	low	AboveMedian	BelowMedian	NIV3-NAIVE	Nivo	SD	SD	20.7967	3.74538	0	0	0	0	-28.8136	73	NonResponder	0
CM38	Affy_at_Screen_and_Day29		1	8	1150.37	1452.69	1506.98	NA	302.328	356.617	NA	0	0	0	NA	0	0	0	NA	low	low	low	AboveMedian	AboveMedian	NIV3-PROG	Nivo	PD	PD	5.25667	1.77413	0	0	45	5+%	14.5833	121	NonResponder	0
CM38	No_Affy_Data		102	14	1083.38	1216.9	1300.96	NA	133.521	217.582	NA	0	0	0	NA	0	0	0	NA	low	low	low	BelowMedian	AboveMedian	NIV3-NAIVE	Nivo	SD	SD	24.0493	3.67967	0	0	0	0	-1.44928	92	NonResponder	0
CM38	Affy_at_Day29		101	14	1051.66	NA	1014.78	NA	NA	-36.8806	NA	0	NA	0	NA	1	NA	0	NA	low	NA	low	NA	BelowMedian	NIV3-PROG	Nivo	PR	CRPR	28.1232	20.1068	1	0	NA	NA	-40	66	Responder	1
CM38	Affy_at_Day29		62	11	1003.64	1195.76	1184.4	NA	192.125	180.762	NA	0	0	0	NA	0	0	0	NA	low	low	low	AboveMedian	AboveMedian	NIV3-NAIVE	Nivo	PD	PD	15.5072	1.83984	0	0	0	0	31.5476	138	NonResponder	0
CM38	Affy_at_Screen_and_Day29		23	9	924.666	870.945	NA	NA	-53.7213	NA	NA	0	0	NA	NA	0	0	NA	NA	low	low	NA	BelowMedian	NA	NIV3-NAIVE	Nivo	NE	NE	1.70842	1.70842	0	0	60	5+%	NA	158	NA	NA
CM38	Affy_at_Screen		63	11	918.421	928.742	988.094	NA	10.3212	69.673	NA	0	0	0	NA	0	0	0	NA	low	low	low	BelowMedian	BelowMedian	NIV3-NAIVE	Nivo	CR	CRPR	53.6181	12.8789	1	1	4	1to5%	-100	15	Responder	1
CM38	Affy_at_Screen_and_Day29		52	11	905.645	1148.34	1126.37	NA	242.697	220.722	NA	0	0	0	NA	0	0	0	NA	low	low	low	AboveMedian	AboveMedian	NIV3-PROG	Nivo	PD	PD	15.6386	1.87269	0	0	5	5+%	26.6667	133	NonResponder	0
CM38	Affy_at_Day29		93	14	898.254	1042.49	929.325	NA	144.235	31.071	NA	0	0	0	NA	0	0	0	NA	low	low	low	BelowMedian	BelowMedian	NIV3-PROG	Nivo	PD	PD	27.8932	1.67556	1	0	NA	NA	27.451	136	NonResponder	0
CM38	Affy_at_Day29		103	14	748.227	794.612	NA	NA	46.3853	NA	NA	0	0	NA	NA	0	0	NA	NA	low	low	NA	BelowMedian	NA	NIV3-PROG	Nivo	PD	PD	15.9014	1.64271	1	0	NA	NA	24.1935	128	NonResponder	0
CM38	Affy_at_Screen_and_Day29		49	11	694.723	773.656	671.103	NA	78.9337	-23.62	NA	0	0	0	NA	0	0	0	NA	low	low	low	BelowMedian	BelowMedian	NIV3-PROG	Nivo	PR	CRPR	27.1704	27.1704	1	1	NA	NA	-88.8889	21	Responder	1

## Sheet: TS2_Genesets
Probeset	ENTREZ	LocusLink	Symbol	IRIS_Most_Specific	Geneset_ccRCC	Geneset_IMmotion150	Geneset_Merck18_TIS	Geneset_EMTstroma	Geneset_Javelin	Geneset_Cytolytic	Geneset_MMP_ADAM
916_at	916	LOC916	CD3E	T Cell					Javelin26
919_at	919	LOC919	CD247	Lymphoid					Javelin26
917_at	917	LOC917	CD3G	T Cell					Javelin26
3123_at	3123	LOC3123	HLA-DRB1				Merck_Up
7130_at	7130	LOC7130	TNFAIP6	Myeloid	ccrcc2.up
29126_at	29126	LOC29126	CD274	Myeloid	ccrcc4.up	McDermott_Teff	Merck_Up
952_at	952	LOC952	CD38	Multiple	ccrcc4.up
3620_at	3620	LOC3620	IDO1	Myeloid			Merck_Up
3569_at	3569	LOC3569	IL6	Monocyte		McDermott_Myeloid
5743_at	5743	LOC5743	PTGS2	Myeloid		McDermott_Myeloid
6352_at	6352	LOC6352	CCL5	Multiple			Merck_Up		Javelin26
1240_at	1240	LOC1240	CMKLR1				Merck_Up
4283_at	4283	LOC4283	CXCL9	Multiple			Merck_Up
3117_at	3117	LOC3117	HLA-DQA1				Merck_Up
5699_at	5699	LOC5699	PSMB10				Merck_Up
6772_at	6772	LOC6772	STAT1	Multiple			Merck_Up
2841_at	2841	LOC2841	GPR18	Lymphoid					Javelin26
3001_at	3001	LOC3001	GZMA	Lymphoid						Geneset_Cytolytic
4015_at	4015	LOC4015	LOX		ccrcc3.dn			EMTstroma
230_at	230	LOC230	ALDOC		ccrcc3.dn
51129_at	51129	LOC51129	ANGPTL4		ccrcc3.dn	McDermott_Angio
768_at	768	LOC768	CA9		ccrcc3.dn
857_at	857	LOC857	CAV1		ccrcc3.dn
5284_at	5284	LOC5284	PIGR		ccrcc1.dn
256714_at	256714	LOC256714	MAP7D2		ccrcc1.up
492307_at	492307	LOC492307	C8ORF22		ccrcc1.up
2138_at	2138	LOC2138	EYA1		ccrcc1.up
2903_at	2903	LOC2903	GRIN2A		ccrcc1.up
4684_at	4684	LOC4684	NCAM1		ccrcc1.up
22986_at	22986	LOC22986	SORCS3		ccrcc1.up
6695_at	6695	LOC6695	SPOCK1		ccrcc1.up
27347_at	27347	LOC27347	STK39		ccrcc1.up
29974_at	29974	LOC29974	A1CF		ccrcc2.dn
2243_at	2243	LOC2243	FGA		ccrcc2.dn
5502_at	5502	LOC5502	PPP1R1A		ccrcc2.dn
1573_at	1573	LOC1573	CYP2J2		ccrcc2.up
115677_at	115677	LOC115677	NOSTRIN		ccrcc2.up
10590_at	10590	LOC10590	SCGN		ccrcc2.up
10050_at	10050	LOC10050	SLC17A4		ccrcc2.up
6523_at	6523	LOC6523	SLC5A1		ccrcc2.up
1356_at	1356	LOC1356	CP		ccrcc3.dn
7422_at	7422	LOC7422	VEGFA		ccrcc3.dn	McDermott_Angio
5228_at	5228	LOC5228	PGF		ccrcc3.dn
7039_at	7039	LOC7039	TGFA	Multiple	ccrcc3.dn
50617_at	50617	LOC50617	ATP6V0A4		ccrcc3.up
1014_at	1014	LOC1014	CDH16		ccrcc3.up
6422_at	6422	LOC6422	SFRP1		ccrcc3.up
8416_at	8416	LOC8416	ANXA9		ccrcc3.up
245972_at	245972	LOC245972	ATP6V0D2		ccrcc3.up
57828_at	57828	LOC57828	CATSPERG		ccrcc3.up
1015_at	1015	LOC1015	CDH17		ccrcc3.up
1555_at	1555	LOC1555	CYP2B6		ccrcc3.up
1733_at	1733	LOC1733	DIO1		ccrcc3.up
2066_at	2066	LOC2066	ERBB4		ccrcc3.up
3827_at	3827	LOC3827	KNG1		ccrcc3.up
5208_at	5208	LOC5208	PFKFB2		ccrcc3.up
5618_at	5618	LOC5618	PRLR		ccrcc3.up
5816_at	5816	LOC5816	PVALB		ccrcc3.up
9376_at	9376	LOC9376	SLC22A8		ccrcc3.up
33_at	33	LOC33	ACADL		ccrcc4.dn
8029_at	8029	LOC8029	CUBN		ccrcc4.dn
10249_at	10249	LOC10249	GLYAT		ccrcc4.dn
4036_at	4036	LOC4036	LRP2		ccrcc4.dn
10786_at	10786	LOC10786	SLC17A3		ccrcc4.dn
159963_at	159963	LOC159963	SLC5A12		ccrcc4.dn
6540_at	6540	LOC6540	SLC6A13		ccrcc4.dn
27233_at	27233	LOC27233	SULT1C4		ccrcc4.dn
27299_at	27299	LOC27299	ADAMDEC1		ccrcc4.up
9447_at	9447	LOC9447	AIM2	Lymphoid	ccrcc4.up
712_at	712	LOC712	C1QA		ccrcc4.up
10563_at	10563	LOC10563	CXCL13		ccrcc4.up
3512_at	3512	LOC3512	IGJ		ccrcc4.up
3880_at	3880	LOC3880	KRT19		ccrcc4.up
11040_at	11040	LOC11040	PIM2	Lymphoid	ccrcc4.up
5328_at	5328	LOC5328	PLAU		ccrcc4.up
6423_at	6423	LOC6423	SFRP2		ccrcc4.up
6590_at	6590	LOC6590	SLPI		ccrcc4.up
3514_at	3514	LOC3514	IGKC	B Cell	ccrcc4.up
2919_at	2919	LOC2919	CXCL1	Monocyte		McDermott_Myeloid
947_at	947	LOC947	CD34			McDermott_Angio
11082_at	11082	LOC11082	ESM1			McDermott_Angio
3791_at	3791	LOC3791	KDR			McDermott_Angio
5175_at	5175	LOC5175	PECAM1			McDermott_Angio
3576_at	3576	LOC3576	IL8	Myeloid		McDermott_Myeloid
2920_at	2920	LOC2920	CXCL2			McDermott_Myeloid
2921_at	2921	LOC2921	CXCL3	Monocyte		McDermott_Myeloid
925_at	925	LOC925	CD8A	T Cell		McDermott_Teff	Merck_Up
8320_at	8320	LOC8320	EOMES	Lymphoid		McDermott_Teff			Javelin26
5551_at	5551	LOC5551	PRF1	Lymphoid		McDermott_Teff			Javelin26	Geneset_Cytolytic
3458_at	3458	LOC3458	IFNG	Lymphoid		McDermott_Teff
80381_at	80381	LOC80381	CD276				Merck_Down
4818_at	4818	LOC4818	NKG7	Lymphoid			Merck_Up
939_at	939	LOC939	CD27	Lymphoid			Merck_Up
10663_at	10663	LOC10663	CXCR6	T Cell			Merck_Up
3133_at	3133	LOC3133	HLA-E				Merck_Up
3902_at	3902	LOC3902	LAG3	T Cell			Merck_Up
80380_at	80380	LOC80380	PDCD1LG2	Dendritic Cell			Merck_Up
201633_at	201633	LOC201633	TIGIT	Lymphoid			Merck_Up
9051_at	9051	LOC9051	PSTPIP1						Javelin26
800_at	800	LOC800	CALD1					EMTstroma
2014_at	2014	LOC2014	EMP3					EMTstroma
2200_at	2200	LOC2200	FBN1					EMTstroma
2316_at	2316	LOC2316	FLNA					EMTstroma
2335_at	2335	LOC2335	FN1					EMTstroma
2303_at	2303	LOC2303	FOXC2					EMTstroma
3371_at	3371	LOC3371	TNC					EMTstroma
914_at	914	LOC914	CD2	Lymphoid					Javelin26
51744_at	51744	LOC51744	CD244	NK Cell					Javelin26
923_at	923	LOC923	CD6	T Cell					Javelin26
926_at	926	LOC926	CD8B	T Cell					Javelin26
10225_at	10225	LOC10225	CD96	Lymphoid					Javelin26
8530_at	8530	LOC8530	CST7	Multiple					Javelin26
2672_at	2672	LOC2672	GFI1						Javelin26
9402_at	9402	LOC9402	GRAP2						Javelin26
3575_at	3575	LOC3575	IL7R	Multiple					Javelin26
3702_at	3702	LOC3702	ITK	Lymphoid					Javelin26
3824_at	3824	LOC3824	KLRD1	Lymphoid					Javelin26
197358_at	197358	LOC197358	NLRC3	Lymphoid					Javelin26
4068_at	4068	LOC4068	SH2D1A						Javelin26
27240_at	27240	LOC27240	SIT1						Javelin26
387357_at	387357	LOC387357	THEMIS						Javelin26
50852_at	50852	LOC50852	TRAT1	T Cell					Javelin26
3738_at	3738	LOC3738	KCNA3						Javelin26
8749_at	8749	LOC8749	ADAM18								MMP60
8747_at	8747	LOC8747	ADAM21								MMP60
101_at	101	LOC101	ADAM8								MMP60
171019_at	171019	LOC171019	ADAMTS19								MMP60
4321_at	4321	LOC4321	MMP12								MMP60
4312_at	4312	LOC4312	MMP1								MMP60
170690_at	170690	LOC170690	ADAMTS16								MMP60
81792_at	81792	LOC81792	ADAMTS12								MMP60
56999_at	56999	LOC56999	ADAMTS9								MMP60
6868_at	6868	LOC6868	ADAM17								MMP60
170692_at	170692	LOC170692	ADAMTS18								MMP60
4323_at	4323	LOC4323	MMP14								MMP60
9507_at	9507	LOC9507	ADAMTS4								MMP60
53616_at	53616	LOC53616	ADAM22								MMP60
8754_at	8754	LOC8754	ADAM9								MMP60
8756_at	8756	LOC8756	ADAM7								MMP60
11174_at	11174	LOC11174	ADAMTS6								MMP60
4324_at	4324	LOC4324	MMP15								MMP60
64386_at	64386	LOC64386	MMP25								MMP60
8751_at	8751	LOC8751	ADAM15								MMP60
9313_at	9313	LOC9313	MMP20								MMP60
11096_at	11096	LOC11096	ADAMTS5								MMP60
9510_at	9510	LOC9510	ADAMTS1								MMP60
4322_at	4322	LOC4322	MMP13								MMP60
4327_at	4327	LOC4327	MMP19								MMP60
4318_at	4318	LOC4318	MMP9								MMP60
8728_at	8728	LOC8728	ADAM19								MMP60
118856_at	118856	LOC118856	MMP21								MMP60
10863_at	10863	LOC10863	ADAM28								MMP60
4325_at	4325	LOC4325	MMP16								MMP60
2515_at	2515	LOC2515	ADAM2								MMP60
10893_at	10893	LOC10893	MMP24								MMP60
4317_at	4317	LOC4317	MMP8								MMP60
80070_at	80070	LOC80070	ADAMTS20								MMP60
11086_at	11086	LOC11086	ADAM29								MMP60
4319_at	4319	LOC4319	MMP10								MMP60
170691_at	170691	LOC170691	ADAMTS17								MMP60
102_at	102	LOC102	ADAM10								MMP60
11173_at	11173	LOC11173	ADAMTS7								MMP60
81794_at	81794	LOC81794	ADAMTS10								MMP60
11085_at	11085	LOC11085	ADAM30								MMP60
9509_at	9509	LOC9509	ADAMTS2								MMP60
11095_at	11095	LOC11095	ADAMTS8								MMP60
4316_at	4316	LOC4316	MMP7								MMP60
170689_at	170689	LOC170689	ADAMTS15								MMP60
4313_at	4313	LOC4313	MMP2								MMP60
64066_at	64066	LOC64066	MMP27								MMP60
4314_at	4314	LOC4314	MMP3								MMP60
79148_at	79148	LOC79148	MMP28								MMP60
80332_at	80332	LOC80332	ADAM33								MMP60
9508_at	9508	LOC9508	ADAMTS3								MMP60
56547_at	56547	LOC56547	MMP26								MMP60
4320_at	4320	LOC4320	MMP11								MMP60
8038_at	8038	LOC8038	ADAM12								MMP60
4326_at	4326	LOC4326	MMP17								MMP60
8745_at	8745	LOC8745	ADAM23								MMP60
11093_at	11093	LOC11093	ADAMTS13								MMP60
8748_at	8748	LOC8748	ADAM20								MMP60
4185_at	4185	LOC4185	ADAM11								MMP60
140766_at	140766	LOC140766	ADAMTS14								MMP60

## Sheet: TS3_CM9_Corr_bl_bl
Biomarker	p.value_pearson	Cor_pearson	p.value_spearman	Cor_spearman	p.value_kendall	Cor_kendall
IM150_Angio.Score	0.018	-0.31	0.024	-0.29	0.034	-0.19
IM150_MyeloidInfl.Score	0.74	0.04	0.503	0.09	0.468	0.06
IM150_Teff.Score	0.264	0.15	0.216	0.16	0.207	0.11
TIS	0.276	0.14	0.376	0.12	0.406	0.07
Javelin.Score	0.201	0.17	0.302	0.14	0.356	0.08
EMTstroma.Score	0.99	0	0.684	0.05	0.769	0.03
CS_pre.B_cell_naive	0.281	-0.14	0.154	-0.19	0.156	-0.13
CS_pre.B_cell_memory	0.177	0.18	0.315	0.13	0.339	0.1
CS_pre.B_cell_plasma	0.22	0.16	0.892	-0.02	0.917	-0.01
CS_pre.T_cell_CD8+	0.194	0.17	0.368	0.12	0.346	0.08
CS_pre.T_cell_gamma_delta	0.792	0.04	0.558	-0.08	0.508	-0.06
CS_pre.NK_cell_activated	0.149	-0.19	0.312	-0.13	0.317	-0.09
CS_pre.Monocyte	0.563	0.08	0.322	-0.13	0.32	-0.09
CS_pre.Macrophage_M0	0.797	0.03	0.133	0.2	0.142	0.15
CS_pre.Macrophage_M1	0.63	-0.06	0.412	-0.11	0.436	-0.07
CS_pre.Macrophage_M2	0.341	-0.13	0.445	-0.1	0.406	-0.07
CS_pre.Myeloid_dendritic_cell_resting	0.985	0	0.862	0.02	0.821	0.02
CS_pre.Myeloid_dendritic_cell_activated	0.571	-0.08	0.895	-0.02	0.909	-0.01
CS_pre.Mast_cell_activated	0.987	0	0.497	-0.09	0.474	-0.07
CS_pre.Mast_cell_resting	0.009	0.34	0.084	0.23	0.074	0.16
CS_pre.Neutrophil	0.429	0.1	0.657	0.06	0.666	0.04
CS_pre.CD4.T.cell	0.812	-0.03	0.609	-0.07	0.633	-0.04

## Sheet: TS4_CM38_Corr_bl_bl
Biomarker	p.value_pearson	Cor_pearson	p.value_spearman	Cor_spearman	p.value_kendall	Cor_kendall
IM150_Angio.Score	0.216	-0.19	0.079	-0.27	0.103	-0.17
IM150_MyeloidInfl.Score	0.253	-0.18	0.046	-0.3	0.056	-0.2
TIS	0.592	-0.08	0.933	-0.01	0.927	-0.01
EMTstroma.Score	0.333	-0.15	0.243	-0.18	0.22	-0.13
Cytolytic.Score	0.422	-0.12	0.55	-0.09	0.55	-0.06
CS_pre.B.cell.naive	0.928	-0.01	0.697	0.06	0.719	0.04
CS_pre.B.cell.memory	0.22	0.19	0.651	0.07	0.54	0.07
CS_pre.B.cell.plasma	0.731	-0.05	0.835	-0.03	0.806	-0.03
CS_pre.T.cell.CD8	0.778	-0.04	0.854	0.03	0.863	0.02
CS_pre.T.cell.gamma.delta	0.88	0.02	0.85	0.03	0.847	0.02
CS_pre.NK.cell.activated	0.933	0.01	0.476	0.11	0.497	0.07
CS_pre.Monocyte	0.299	-0.16	0.495	-0.11	0.521	-0.07
CS_pre.Macrophage.M0	0.909	-0.02	0.604	-0.08	0.634	-0.05
CS_pre.Macrophage.M1	0.37	-0.14	0.354	-0.14	0.336	-0.1
CS_pre.Macrophage.M2	0.965	-0.01	0.928	0.01	0.992	0
CS_pre.Myeloid.dendritic.cell.resting	0.905	0.02	0.714	0.06	0.683	0.04
CS_pre.Mast.cell.activated	0.748	0.05	1	0	0.959	0.01
CS_pre.Mast.cell.resting	0.535	-0.1	0.557	-0.09	0.545	-0.07
CS_pre.Eosinophil	0.14	-0.23	0.461	-0.11	0.425	-0.09
CS_pre.Neutrophil	0.389	-0.13	0.07	-0.28	0.093	-0.19
CS_pre.T.cell.CD4	0.959	0.01	0.895	0.02	0.96	0.01

## Sheet: TS5_HALLMARK_GSEA_results_Union
Union of Significant Hallmark results	Dataset	Dir_in_dataset	Dir_in_other_set	Enrich_in_other_set	setSize	enrichmentScore	NES	pvalue	p.adjust	qvalues	rank	core_enrichment	tags_pct	list_pct	signal_pct	Compare_Direction
ADIPOGENESIS	CM9	Negative			194	-0.453709	-1.84111	0.00135685	0.00865651	0.00437381	3868	FAH/SUCLG1/AK2/CAVIN1/NKIRAS1/PPP1R15B/ATL2/REEP5/ESYT1/ETFB/PPARG/CPT2/ELOVL6/COX8A/GPD2/ALDOA/SOD1/ATP5PO/COQ9/STOM/LPCAT3/SSPN/PDCD4/SDHC/JAGN1/VEGFB/NDUFAB1/MGST3/LPL/MTCH2/MCCC1/HIBCH/SDHB/ECH1/DLAT/GPAM/ECHS1/DHRS7B/TOB1/PGM1/DBT/CCNG2/CD151/COQ3/PHYH/SORBS1/ACLY/ALDH2/MARC2/LAMA4/CDKN2C/GPX3/GBE1/DNAJC15/SLC66A3/COQ5/SAMM50/COL15A1/PRDX3/HSPB8/SLC25A1/ACADM/PTGER3/FABP4/SOWAHC/COL4A1/EPHX2…	0.39	0.21	0.31
ALLOGRAFT_REJECTION	CM38	Negative	Positive	2.20739	197	-0.572943	-2.28168	0.00238095	0.00527649	0.00166626	3709	AKT1/CD247/MMP9/IL10/CD3E/IL2RB/HLA-DRA/HDAC9/CD74/CD3G/ITGAL/BCL3/ST8SIA4/ELF4/CCR5/STAB1/TLR2/B2M/CCR2/CD4/IRF8/SOCS1/DYRK3/CD8B/FASLG/ZAP70/HLA-DMB/LCK/JAK2/ICOSLG/CD96/HCLS1/IFNGR2/CD1D/NLRP3/IL15/SIT1/TLR3/TGFB1/INHBA/SOCS5/LY75/IFNG/HLA-A/BCAT1/UBE2D1/HLA-DMA/LIF/GLMN/TRAT1/CD47/CD8A/CRTAM/CCL11/LY86/GCNT1/ITK/HLA-E/KLRD1/MBL2/LYN/FGR/BCL10/IL11/F2/FYB1/CCL7/CD3D/TLR1/IFNAR2/GZMA/IL2RA/ELAN…	0.54	0.2	0.43	Opposite
ALLOGRAFT_REJECTION	CM9	Positive	Negative	-2.28168	197	0.471717	2.20739	0.0037594	0.0156642	0.00791452	2889	CD3E/GCNT1/CCL13/CD8A/CCL7/GZMB/MMP9/CD79A/C2/IRF4/IL18/IL2RG/CD3D/FCGR2B/PRKCB/NCF4/CD8B/CCR1/CD28/FGR/IL16/CD3G/SRGN/CXCL13/CCL5/TRAT1/IL1B/HCLS1/SIT1/IL2RA/CD96/EREG/PTPRC/LTB/CXCR3/FLNA/ITGAL/STAT4/F2/MAP4K1/JAK2/CXCL9/PTPN6/ZAP70/CSF1/IFNG/CSK/ELF4/LCP2/CRTAM/GZMA/LCK/CD80/RPS3A/CFP/ITK/CCL22/WAS/CD4/CDKN2A/CTSS/BCL3/IL18RAP/PRF1/KLRD1/CD247/FYB1/CD2/EIF5A/HIF1A/TIMP1/SPI1	0.37	0.16	0.31	Opposite
ANDROGEN_RESPONSE	CM38	Negative	Negative	-1.54045	97	-0.379522	-1.36973	0.0234192	0.03444	0.0108758	3709	AKT1/SEC24D/INPP4B/ADAMTS1/STEAP4/PTK2B/ZMIZ1/PDLIM5/B2M/SLC38A2/RAB4A/ACSL3/NGLY1/INSIG1/HMGCS1/RPS6KA3/MERTK/IDI1/MYL12A/H1-0/GNAI3/SCD/FADS1/CCND1/SAT1/DHCR24/CDK6/SPCS3/UBE2J1/UAP1/GPD1L/ACTN1/PGM3/TNFAIP8/IQGAP2/LMAN1/NDRG1/TPD52/KRT8/ALDH1A3/AKAP12	0.42	0.2	0.34	Same
ANDROGEN_RESPONSE	CM9	Negative	Negative	-1.36973	97	-0.41636	-1.54045	0.0134328	0.0395083	0.0199621	3565	NCOA4/IDI1/STEAP4/INPP4B/SLC26A2/DHCR24/CCND3/TMEM50A/AZGP1/PMEPA1/SLC38A2/PGM3/KRT8/ELOVL5/GNAI3/RAB4A/TSC22D1/ADAMTS1/ZBTB10/SELENOP/SGK1/SCD/LMAN1/PA2G4/ITGAV/HMGCS1/MAF/GUCY1A1/MAP7/PLPP1/ABCC4/NDRG1/ARID5B/CCND1/LIFR/KRT19	0.37	0.19	0.3	Same
ANGIOGENESIS	CM9	Negative			36	-0.538181	-1.68175	0.00683761	0.02442	0.0123385	2258	APP/POSTN/THBD/NRP1/CCND2/LPL/KCNJ8/PDGFA/COL3A1/JAG2/PTK2/ITGAV/SPP1/STC1/JAG1/TNFRSF21/SLCO2A1/VEGFA/CXCL6	0.53	0.12	0.46
APOPTOSIS	CM38	Negative			158	-0.495629	-1.90835	0.00242718	0.00527649	0.00166626	3245	CASP3/LEF1/CASP6/APP/BAX/GADD45B/MCL1/GPX1/PPP3R1/LMNA/FEZ1/RHOB/FASLG/DNAJC3/ADD1/DNAJA1/SPTAN1/H1-0/PLPPR4/ATF3/SLC20A1/GSN/PPP2R5B/BIK/CD69/CLU/TGFBR3/MGMT/CCND1/EBP/SAT1/PLAT/LGALS3/PEA15/BIRC3/TIMP3/BTG2/BCL10/F2/CASP9/DPYD/IGFBP6/BNIP3L/TNFSF10/IRF1/CD38/SC5D/GADD45A/IER3/SOD2/HMOX1/CD14/FAS/TIMP1/JUN/CDKN1A/TAP1/IFITM3/PRF1/IL6/CTH/GPX3/SATB1/GCH1/FDXR/CASP4/F2R/ENO2/TNFRSF12A/ISG20/IL1B/C…	0.47	0.18	0.39
BILE_ACID_METABOLISM	CM38	Negative			111	-0.574668	-2.12987	0.00229885	0.00527649	0.00166626	2810	TFCP2L1/LCK/HACL1/AGXT/IDI1/PEX7/ABCG8/FADS1/HSD3B7/BMP6/CYP7A1/PEX13/SERPINA6/DHCR24/NR1H4/AR/NR0B2/ABCA6/PXMP2/GC/GNPAT/DIO1/SLC23A2/GNMT/APOA1/OPTN/PHYH/PIPOX/HSD17B11/NEDD4/SLC22A18/ABCA3/PEX19/PEX11A/CYP8B1/ABCA1/ALDH1A1/CYP39A1/CAT/SLC27A5/ALDH8A1/IDH1/BCAR3/PECR/HAO1/FADS2/SLC27A2/AQP9/AKR1D1/GCLM/FDXR/ACSL1/TTR	0.48	0.15	0.41
CHOLESTEROL_HOMEOSTASIS	CM38	Negative			69	-0.571525	-1.96546	0.00226244	0.00527649	0.00166626	2817	PMVK/HMGCS1/IDI1/PNRC1/ATF3/MVK/LDLR/PPARG/SCD/CLU/GLDC/STARD4/EBP/ANTXR2/LGALS3/FDPS/S100A11/LSS/LPL/ADH4/CXCL16/ALCAM/MVD/SC5D/PDK3/PLAUR/FADS2/TM7SF2/ACSS2/TRIB3/PLSCR1/ERRFI1/TNFRSF12A/ATF5	0.49	0.15	0.42
COAGULATION	CM38	Negative			137	-0.525074	-1.98822	0.00234192	0.00527649	0.00166626	2303	GSN/MSRB2/ACOX2/HPN/CLU/C8B/CTSE/MAFF/LRP1/PLAT/USP11/APOC3/TIMP3/FGA/F13B/MBL2/C1S/CTSB/C9/APOA1/CAPN2/KLF7/F2/CASP9/HRG/MASP2/ITGA2/CRIP2/PROC/PLG/ITGB3/F11/ITIH1/KLKB1/HMGCS2/FGG/RGN/F9/PLEK/TIMP1/C8A/CPQ/C1R/C1QA/C2/CPB2/SERPINE1/FN1/APOC1/PROS1/MMP1/DUSP6/CFI/SERPINA1/SERPING1/PF4/ANG/ANXA1	0.42	0.13	0.37
COMPLEMENT	CM38	Negative	Positive	1.9106	199	-0.601246	-2.39754	0.00239234	0.00527649	0.00166626	2865	L3MBTL4/CTSC/LCK/CSRP1/JAK2/CFB/CFH/LAP3/FYN/CTSD/PIK3CA/GMFB/PDP1/GNAI3/GRB2/MSRB1/CLU/SCG3/MAFF/LRP1/LTF/LIPA/S100A9/PLAT/LGALS3/F5/SRC/C1S/LYN/CTSB/C9/CD46/F2/CASP9/GNAI2/IRF2/TNFAIP3/GPD2/DOCK4/GZMA/ITGAM/ZEB1/PLG/ITIH1/KLKB1/CD36/IRF1/CP/CXCL1/APOBEC3G/PLAUR/HSPA1A/GNG2/CTSS/PLEK/PSMB9/TIMP1/CPQ/C1QC/C1R/C1QA/FCER1G/C2/CR1/GZMB/C4BPB/IL6/CEBPB/SERPINE1/LCP2/GCA/FCN1/PLSCR1/FN1/APOC1/CASP4/KY…	0.44	0.16	0.38	Opposite
COMPLEMENT	CM9	Positive	Negative	-2.39754	199	0.407955	1.9106	0.0037594	0.0156642	0.00791452	1613	MMP12/KLK1/PLAUR/APOA4/GZMB/S100A9/S100A12/C2/PRKCD/ERAP2/CD55/SERPINE1/PIM1/LRP1/CEBPB/F3/SERPINC1/PRSS3/F10/SRC/FCN1/CTSD/CCL5/C4BPB/ITGAM/SCG3/F5/LGALS3/CTSL/CDA/ITIH1/CFH/TIMP2/GZMK/CTSH/MMP13/DGKG/C9/CR1/USP15/PLA2G7/CTSB/F2/C1R/PCSK9/JAK2/LGMN/IRF1/PIK3R5/PLEK/LCP2/GZMA/SERPINB2/LCK	0.27	0.09	0.25	Opposite
E2F_TARGETS	CM38	Positive	Negative	-1.72064	195	0.52341	1.97018	0.00172117	0.00527649	0.00166626	4864	NCAPD2/PAN2/MCM4/CDCA3/NUP107/HMGA1/TRIP13/ATAD2/RAD21/DDX39A/DSCC1/BRCA2/TOP2A/PA2G4/MCM7/BRCA1/CDK4/NUP153/RAD51AP1/UNG/CCNB2/RAD1/NBN/RACGAP1/TIMELESS/PMS2/MYC/TCF19/SMC6/PRKDC/MCM3/EZH2/BIRC5/TBRG4/MAD2L1/AURKB/RANBP1/CCNE1/POLD1/RPA1/PSMC3IP/SPAG5/GINS3/CDC25A/RFC3/NOLC1/RNASEH2A/RPA3/BUB1B/PTTG1/CENPM/RAD51C/SPC25/CDKN3/HMGB3/HMMR/CHEK2/UBR7/ILF3/POLD2/WDR90/TK1/ESPL1/CDC20/RAD50/DLGAP5/LYA…	0.57	0.26	0.43	Opposite
E2F_TARGETS	CM9	Negative	Positive	1.97018	195	-0.423786	-1.72064	0.00135318	0.00865651	0.00437381	4109	STAG1/H2AZ1/NOLC1/CTCF/DCLRE1B/MRE11/RAD51AP1/SMC1A/CSE1L/STMN1/AK2/TUBB/EIF2S1/PMS2/MCM4/EED/NUDT21/MCM7/HMGB2/UBE2T/CDCA3/MKI67/ASF1A/PRDX4/ING3/E2F8/RNASEH2A/PPP1R8/NAP1L1/MAD2L1/SPC25/RACGAP1/DSCC1/DIAPH3/SYNCRIP/TMPO/POLD2/PDS5B/EXOSC8/RAD1/USP1/KIF18B/BRCA2/GINS1/DEK/NUP107/SMC6/CDK1/SSRP1/RAD51C/CDKN1B/PRPS1/CCP110/RRM2/NCAPD2/TFRC/NUP153/TUBG1/TP53/PCNA/MSH2/KIF4A/MYC/NBN/UNG/CHEK1/GINS3/…	0.43	0.22	0.33	Opposite
EPITHELIAL_MESENCHYMAL_TRANSITION	CM38	Negative			197	-0.380608	-1.51573	0.00476191	0.00881834	0.00278474	1951	LAMC1/TPM4/BASP1/PDLIM4/LGALS1/SAT1/ITGB5/LRP1/TPM1/THBS2/TIMP3/IL32/CXCL6/LOXL2/TNFAIP3/NNMT/WIPF1/ITGA2/FSTL3/ITGB3/PLOD1/FMOD/NT5E/ITGB1/FGF2/PCOLCE2/SDC4/TNFRSF11B/VCAM1/MAGEE1/CTHRC1/FLNA/CXCL1/TGM2/GADD45A/FERMT2/PLAUR/FAS/TIMP1/JUN/QSOX1/SPP1/PFN2/TNC/LOX/IL6/SGCB/SERPINE1/VEGFA/PLOD2/FN1/ANPEP/SNTB1/IGFBP3/MMP1/ENO2/TNFRSF12A/SERPINE2/CDH2/CADM1/IGFBP2/LAMA1/DKK1/PTX3/SFRP1/CXCL8	0.34	0.11	0.3
ESTROGEN_RESPONSE_EARLY	CM38	Positive			196	0.378144	1.42492	0.0120482	0.0188253	0.00594483	2582	ELOVL2/SFN/HR/KRT15/ABLIM1/AQP3/SLC24A3/RHOD/SLC7A5/SLC7A2/HSPB8/KRT13/LAD1/FHL2/FKBP4/FAM102A/FARP1/SLC37A1/MLPH/TIAM1/MYBBP1A/SLC19A2/KRT19/SYNGR1/TSKU/GAB2/SLC26A2/NAV2/OLFML3/FOXC1/MYBL1/MSMB/KRT18/MYC/SNX24/BCL11B/TTC39A/IL17RB/GLA/PODXL/TPBG/P2RY2/ESRP2/GJA1/RRP12/MAPT/CYP26B1/SULT2B1/MREG/ALDH3B1/CLIC3/BAG1/OLFM1/ANXA9/KLF4/PPIF/AKAP1/TIPARP	0.3	0.14	0.26
ESTROGEN_RESPONSE_LATE	CM38	Positive			195	0.430115	1.61901	0.00172117	0.00527649	0.00166626	3273	GAL/SCUBE2/SFN/HR/FGFR3/KLK11/CKB/NMU/SLC24A3/TRIM29/SLC7A5/CA2/HSPB8/KRT13/CDH1/PDCD4/TSTA3/CDC6/ST6GALNAC2/CXCL14/ETFB/FKBP4/FAM102A/FARP1/MDK/TOP2A/TIAM1/SLC29A1/KIF20A/PKP3/KRT19/PERP/SLC26A2/PCP4/FOXC1/MAPK13/DUSP2/IMPA2/IL17RB/RABEP1/GLA/COX6C/TST/TPBG/RNASEH2A/MAPT/CYP26B1/SULT2B1/ALDH3B1/CLIC3/BAG1/OLFM1/LAMC2/ANXA9/KLF4/PPIF/CHST8/IGSF1/GJB3/ASCL1/TFPI2/STIL/CDC20/RET/GPER1/CD44/CXCL12/C…	0.36	0.18	0.3
FATTY_ACID_METABOLISM	CM38	Negative	Negative	-1.91659	151	-0.436519	-1.67621	0.00238663	0.00527649	0.00166626	3166	SUCLA2/FASN/ECH1/ECI2/ACSL4/AQP7/SERINC1/HMGCS1/AOC3/CPOX/CD1D/CYP1A1/IDI1/S100A10/ALDH3A2/ACADS/ACOX1/EPHX1/ACADVL/ACADL/PSME1/UGDH/LGALS1/CA4/DHCR24/VNN1/CIDEA/CRAT/ETFDH/ACOT8/CBR3/GPD2/HSD17B11/CYP4A11/GLUL/HMGCL/BCKDHB/CA6/ALDH1A1/RDH16/HMGCS2/SUCLG2/FABP1/CD36/PTPRG/IDH1/XIST/ADH1C/HIBCH/ACSM3/GPD1/ACSL1/HAO2/ENO2/MAOA/UBE2L6/G0S2/IL4I1	0.38	0.17	0.32	Same
FATTY_ACID_METABOLISM	CM9	Negative	Negative	-1.67621	151	-0.485655	-1.91659	0.00138504	0.00865651	0.00437381	3842	SUCLG1/IDH3B/PTS/OSTC/TP53INP2/ACADVL/IDI1/MAOA/CPT2/GPD1/GPD2/YWHAH/ALDOA/ACSL5/DHCR24/FABP1/ODC1/S100A10/UROS/NSDHL/GRHPR/SDHC/AOC3/UGDH/HADHB/ELOVL5/AUH/SERINC1/HIBCH/LGALS1/SUCLA2/PPARA/ECH1/MLYCD/CPT1A/ALAD/HSD17B11/ECHS1/ETFDH/NBN/HAO2/ACSS1/ADSL/ACAT2/LDHA/XIST/HSDL2/BCKDHB/ECI2/BPHL/HMGCL/EPHX1/TDO2/HMGCS1/MIF/ALDH9A1/ACADM/CA2/ALDH3A2/HMGCS2/ACADL/PTPRG/ACSM3/CRYZ/ALDH1A1/CD36/FMO1/EHHAD…	0.46	0.21	0.36	Same
G2M_CHECKPOINT	CM38	Positive			196	0.46884	1.76668	0.00172117	0.00527649	0.00166626	4243	SLC7A5/E2F3/CDC45/EXO1/CDC6/CHAF1A/HMGA1/RAD21/DDX39A/SQLE/BRCA2/TOP2A/PBK/SLC38A1/CDK4/CCNB2/RACGAP1/MYC/KIF23/H2AZ2/CCNT1/MCM3/CENPF/EZH2/BIRC5/MAD2L1/AURKB/ABL1/PRPF4B/INCENP/ORC5/RBM14/DKC1/DBF4/SMARCC1/TRAIP/KMT5A/NUP50/CDC25A/NOLC1/TNPO2/NOTCH2/TROAP/PTTG1/TFDP1/CDKN3/PURA/RAD54L/HMGB3/NUSAP1/KIF11/HMMR/TTK/MAPK14/ILF3/STIL/ESPL1/CDC20/HIRA/CENPA/NDC80/CUL4A/GSPT1/MKI67/CKS2/HUS1/BUB1/H2AZ1…	0.46	0.23	0.36
GLYCOLYSIS	CM38	Negative	Negative	-1.93963	199	-0.40924	-1.63189	0.00239234	0.00527649	0.00166626	2628	MERTK/HK2/ARPP19/PKM/ME2/RPE/GNE/SOX9/BIK/IL13RA1/RBCK1/G6PD/PFKP/TPST1/B3GALT6/NDUFV3/PKP2/LHPP/GALE/SLC37A4/CLDN3/PYGL/AGRN/AGL/CHPF/BPNT1/ZNF292/SDC2/GYS2/PLOD1/B3GAT3/NT5E/GFPT1/CYB5A/ALDOB/HS2ST1/ERO1A/PDK3/PYGB/SLC35A3/GPC4/IER3/IDH1/QSOX1/CITED2/P4HA1/SPAG4/CTH/GLRX/CXCR4/VLDLR/VEGFA/PLOD2/SDC3/IGFBP3/DDIT4/SLC16A3/ENO2/ISG20/ANG/STC1/ANGPTL4	0.31	0.14	0.27	Same
GLYCOLYSIS	CM9	Negative	Negative	-1.63189	199	-0.477751	-1.93963	0.0013587	0.00865651	0.00437381	1443	NT5E/HS2ST1/LDHA/KIF20A/TPI1/AGRN/SPAG4/PPP2CB/ALDH7A1/PHKA2/PLOD1/SOX9/MIF/STC1/GLCE/GLRX/DSC2/MXI1/AKR1A1/ABCB6/ALDOB/P4HA1/ALDH9A1/STC2/SLC25A13/CXCR4/RARS1/PDK3/SDC2/GOT1/MPI/PLOD2/PFKP/PGK1/ENO1/CHST1/DDIT4/IGFBP3/MET/SLC37A4/ANGPTL4/TGFBI/CYB5A/AK4/TGFA/VEGFA/EGLN3	0.24	0.08	0.22	Same
HEDGEHOG_SIGNALING	CM38	Negative			36	-0.56051	-1.69607	0.00678733	0.0117823	0.00372071	1571	NRP2/CDK6/PLG/DPYSL2/L1CAM/HEY1/AMOT/VLDLR/VEGFA/HEY2	0.28	0.09	0.25
HEME_METABOLISM	CM38	Negative			195	-0.3841	-1.52773	0.00475059	0.00881834	0.00278474	3347	HDGF/ADIPOR1/KLF1/UROD/GYPB/LAMP2/ASNS/EPB41/NEK7/SELENBP1/SLC10A3/ATG4A/ABCG2/YPEL5/RBM38/RNF123/FECH/CIR1/SLC7A11/MPP1/ADD1/CPOX/MAP2K3/ACP5/RIOK3/RHCE/FTCD/DCAF11/H1-0/PICALM/KHNYN/SEC14L1/PPP2R5B/SLC2A1/ANK1/PPOX/RHAG/HTRA2/ENDOD1/HAGH/SMOX/CTSE/MINPP1/CDC27/GYPA/MYL4/SLC4A1/TSPAN5/BTG2/CTSB/DCUN1D1/BACH1/OPTN/TENT5C/SPTA1/HBQ1/PRDX2/KAT2B/NFE2/LMO2/BNIP3L/LRP10/CAT/HBB/ALDH6A1/LPIN2/ALDH1L1/…	0.42	0.18	0.34
HYPOXIA	CM38	Negative	Negative	-1.87905	198	-0.509524	-2.02702	0.00240964	0.00527649	0.00166626	2007	SLC2A1/PFKFB3/IDS/RORA/PFKP/TES/MAFF/SRPX/GAA/HK1/B3GALT6/LXN/SLC37A4/PDK1/CAVIN1/GBE1/DUSP1/BHLHE40/PYGM/KLF7/TNFAIP3/TMEM45A/ZFP36/ZNF292/PCK1/SDC2/SLC2A5/MAP3K1/BNIP3L/ALDOB/SDC4/CP/MT2A/ERO1A/PDK3/TGM2/GPC4/PLAUR/IER3/NDRG1/HMOX1/TPD52/JUN/MT1E/CITED2/CDKN1A/P4HA1/NEDD4L/LOX/IL6/GLRX/CXCR4/SERPINE1/VLDLR/VEGFA/SDC3/PGF/IGFBP3/DDIT4/ERRFI1/ENO2/HS3ST1/ISG20/PLIN2/FBP1/AKAP12/ADM/STC1/ANGPTL4	0.35	0.11	0.31	Same
HYPOXIA	CM9	Negative	Negative	-2.02702	198	-0.46216	-1.87905	0.00135318	0.00865651	0.00437381	3275	NFIL3/SDC4/CCN1/LXN/ALDOA/ADM/GAPDH/BTG1/ZNF292/IER3/GRHPR/CDKN1C/MAP3K1/XPNPEP1/BGN/TNFAIP3/CSRP2/PDGFB/CDKN1B/P4HA2/PAM/HK2/NR3C1/GCNT2/SLC2A1/PGM1/FAM162A/RORA/CCNG2/LDHA/TPI1/GBE1/MIF/STC1/GLRX/CAV1/CA12/MXI1/ALDOB/CAVIN3/P4HA1/ERRFI1/STC2/CXCR4/PDK3/SLC25A1/SDC2/ACKR3/ETS1/PFKP/PGK1/ENO1/TMEM45A/LOX/BCL2/PDK1/NDRG1/PPP1R3C/ALDOC/NEDD4L/DDIT4/IGFBP3/SLC37A4/PCK1/ANGPTL4/TGFBI/CP/AK4/PLIN2/VEG…	0.36	0.18	0.3	Same
IL2_STAT5_SIGNALING	CM38	Negative			198	-0.410573	-1.63337	0.00240964	0.00527649	0.00166626	3245	CASP3/PRNP/NCOA3/SERPINC1/ECM1/GADD45B/DENND5A/IL10RA/IRF8/SOCS1/ETFBKMT/PDCD2L/RHOB/MXD1/SMPDL3A/SWAP70/MAP3K8/MUC1/HK2/KLF6/FAH/TNFRSF9/RHOH/DCPS/P2RX4/SHE/BATF3/FGL2/RORA/LIF/TWSG1/IL3RA/TNFRSF4/MAFF/GALM/PTGER2/SNX14/SNX9/TRAF1/PRAF2/BHLHE40/LRIG1/MYO1E/ITGA6/IGF1R/SPRED2/SYNGR2/BMPR2/IL2RA/ALCAM/NT5E/TNFRSF21/ABCB1/EOMES/TNFSF10/CD86/TGM2/LRRC8C/ETV4/SLC1A5/NDRG1/RGS16/SELL/SH3BGRL2/TNFRSF1B…	0.41	0.18	0.34
IL6_JAK_STAT3_SIGNALING	CM38	Negative	Positive	1.69231	87	-0.672557	-2.40396	0.00223714	0.00527649	0.00166626	3228	STAT3/CSF2RB/A2M/TLR2/SOCS1/TNFRSF1A/MAP3K8/IFNGR2/CSF2RA/IL10RB/TGFB1/OSMR/CXCL3/IL13RA1/GRB2/CBL/IL6ST/IL15RA/IL3RA/CSF3R/SOCS3/EBI3/STAM2/MYD88/IFNAR1/CCL7/IL2RA/ITGB3/TNFRSF21/CD36/INHBE/IRF1/CD38/LEPR/CXCL1/HMOX1/CD14/FAS/STAT1/JUN/TNFRSF1B/IRF9/ITGA4/IL6/CXCL10/CCR1/TNFRSF12A/IL1B/CXCL11/PLA2G2A/PF4	0.59	0.18	0.49	Opposite
IL6_JAK_STAT3_SIGNALING	CM9	Positive	Negative	-2.40396	87	0.411636	1.69231	0.00289855	0.0156642	0.00791452	2565	PLA2G2A/CCL7/CNTFR/CD44/CD38/IL2RG/PIM1/CCR1/CXCL13/IL1B/CSF3R/IL2RA/LTB/CXCL9/PDGFC/IRF1/CSF1/PIK3R5/IL15RA/CD14/SOCS3/CXCL10/INHBE/IL1R1/GRB2/CSF2RB	0.3	0.14	0.26	Opposite
INFLAMMATORY_RESPONSE	CM38	Negative	Positive	1.8756	200	-0.570386	-2.2763	0.00239234	0.00527649	0.00166626	3194	GPR183/TNFAIP6/BDKRB1/ADGRE1/STAB1/TLR2/IL10RA/SELENOS/PTPRE/C5AR1/MXD1/LCK/CCL24/ICOSLG/CX3CL1/IFNGR2/KLF6/NLRP3/IL15/KCNA3/TNFRSF9/TLR3/LDLR/P2RX4/INHBA/GNAI3/OSMR/CD69/HPN/IL15RA/LIF/DCBLD2/PTAFR/PTGER2/NMI/MSR1/CSF3R/OSM/PDE4B/CCRL2/EBI3/FFAR2/SLC4A4/CXCL6/BTG2/EIF2AK2/LYN/CYBB/CD82/IFNAR1/NFKBIA/CCL7/TLR1/KCNJ2/CXCR6/PROK2/ABCA1/ITGB3/RGS1/C3AR1/CCL20/TNFSF10/IRF1/PLAUR/IL7R/RGS16/CD14/FPR1/…	0.46	0.17	0.38	Opposite
INFLAMMATORY_RESPONSE	CM9	Positive	Negative	-2.2763	200	0.400365	1.8756	0.0037594	0.0156642	0.00791452	2250	MARCO/AQP9/PLAUR/CXCL8/CCL7/SELL/IL18/LPAR1/CD55/SERPINE1/SLC28A2/PDPN/CCR7/SLC7A2/F3/CD82/PTAFR/GABBR1/FFAR2/RGS1/IL7R/PROK2/SLC31A2/C5AR1/CCL5/IL1B/CXCR6/LAMP3/PVR/CSF3R/EREG/NDP/TNFRSF9/KCNA3/SPHK1/CXCL9/GCH1/IRF1/CMKLR1/CCL24/CSF1/KCNMB2/PIK3R5/CCRL2/GPR183/LCP2/IL15RA/LCK/PCDH7/CD14/ABCA1/NAMPT/GNA15/OSM/SLAMF1/ADRM1/GPR132/ADORA2B/LTA/CLEC5A/CCL22/CD69/CXCL10	0.32	0.12	0.28	Opposite
INTERFERON_ALPHA_RESPONSE	CM38	Negative			95	-0.75841	-2.74835	0.00227273	0.00527649	0.00166626	1758	NMI/CD47/LPAR6/CCRL2/C1S/TRIM5/EIF2AK2/BATF2/IRF2/TENT5A/MOV10/IRF1/NCOA7/DHX58/IFITM2/LGALS3BP/IFI35/PSMB9/HERC6/SELL/PROCR/TAP1/PARP12/IFITM3/IRF9/SP110/PSMB8/CXCL10/EPSTI1/UBA7/PARP9/GBP2/SAMD9L/PLSCR1/PARP14/TRIM21/IFI27/SAMD9/GBP4/IFIT2/DDX60/ISG20/IFITM1/UBE2L6/CXCL11/RSAD2/IFIH1/OAS1/BST2/MX1/IFI44/IRF7/CASP1/OASL/IFI44L/ISG15/IFIT3	0.6	0.1	0.55
INTERFERON_GAMMA_RESPONSE	CM38	Negative			196	-0.693886	-2.76434	0.0023753	0.00527649	0.00166626	2127	CD69/PSME1/RBCK1/ITGB7/HLA-A/IL15RA/FGL2/PFKP/HLA-DMA/P2RY14/NMI/SOCS3/PDE4B/SPPL2A/MYD88/C1S/MX2/EIF2AK2/BATF2/SECTM1/ZNFX1/EIF4E3/IRF2/TNFAIP3/NFKBIA/HLA-B/CCL7/IFNAR2/GZMA/SLAMF7/MVP/PTPN6/LYSMD2/APOL6/TNFSF10/VCAM1/IRF1/CD38/METTL7B/DHX58/MT2A/CD86/PTGS2/IFITM2/LGALS3BP/IFI35/SOD2/PSMB9/FPR1/FAS/STAT1/MARCHF1/VAMP5/HERC6/CCL2/OAS2/CDKN1A/TAP1/PARP12/C1R/IFITM3/IRF9/SP110/SAMHD1/IL6/PSMB8/CXCL…	0.52	0.12	0.46
KRAS_SIGNALING_DN	CM38	Positive	Positive	1.37945	194	0.389492	1.46438	0.00860585	0.0143431	0.0045294	811	KRT5/KRT1/COL2A1/CALML5/KLK7/PKP1/FGFR3/KRT15/THNSL2/KLK8/LYPD3/AMBN/COPZ2/TGM1/TFF2/ALOX12B/KRT13/EFHD1/SPRR3/TEX15/SERPINB2/CD207/TENM2	0.12	0.04	0.11	Same
KRAS_SIGNALING_DN	CM9	Positive	Positive	1.46438	194	0.295081	1.37945	0.00754717	0.0251572	0.012711	4662	TFF2/TFCP2L1/CNTFR/ITIH3/CLDN8/SHOX2/ATP6V1B1/RYR2/PTGFR/YBX2/SLC5A5/THRB/SERPINA10/TENT5C/SLC16A7/C5/TFAP2B/ZBTB16/GTF3C5/HSD11B2/IFNG/TAS2R4/SERPINB2/SSTR4/GP2/CD80/CLDN16/DTNB/SIDT1/ACTC1/STAG3/MX1/ATP4A/KMT2D/TENM2/KCND1/HTR1B/TCF7L1/RGS11/ADRA2C/TG/CD40LG/RYR1/NUDT11/SCN10A/SPHK2/CAPN9/TCL1A/HTR1D/CKM/SNN/SPRR3/NPHS1/KRT4/MYO15A/MAGIX/BTG2/ALOX12B/PTPRJ/RIBC2/KRT13/PAX3/KCNE2/SLC12A3	0.33	0.25	0.25	Same
KRAS_SIGNALING_UP	CM38	Negative			198	-0.530987	-2.11241	0.00240964	0.00527649	0.00166626	2972	IL10RA/BTBD3/PPP1R15A/ENG/IRF8/EVI5/ADAM8/TSPAN13/CFB/CFH/CSF2RA/LAT2/SOX9/SERPINA3/VWA5A/INHBA/CLEC4A/CBL/CAB39L/SPARCL1/SCG3/DOCK2/LIF/DCBLD2/TSPAN7/TFPI/KCNN4/TLR8/NR1H4/PLAT/PEG3/NR0B2/CIDEA/BIRC3/TRAF1/CD37/TNFAIP3/ETV5/HOXD11/CFHR2/ITGA2/LCP1/TMEM176B/C3AR1/CCL20/EPB41L3/MAP3K1/ABCB1/ITGB2/HKDC1/PTGS2/ERO1A/ADGRL4/MYCN/LAPTM5/ETV4/IL33/PLAUR/CTSS/IL7R/RGS16/TNFRSF1B/SPP1/FCER1G/ANXA10/TMEM1…	0.45	0.16	0.38
MTORC1_SIGNALING	CM38	Negative	Negative	-1.796	194	-0.393749	-1.56438	0.00475059	0.00881834	0.00278474	2958	PPP1R15A/ACSL3/PGK1/INSIG1/CTSC/HMGCS1/SLC7A11/ADD3/MAP2K3/HK2/IDI1/PSMD12/LDLR/MTHFD2L/IFI30/SCD/SLC2A1/FADS1/G6PD/BCAT1/FGL2/STARD4/HPRT1/EBP/CALR/TES/DHCR24/CYB5B/BTG2/SLC37A4/PDK1/GBE1/BHLHE40/SLC9A3R1/MLLT11/SRD5A1/IGFBP5/EDEM1/RIT1/ITGB2/CORO1A/SKAP2/SC5D/SLA/ERO1A/ELOVL6/NUPR1/SLC1A5/IDH1/SLC1A4/CDKN1A/FADS2/P4HA1/TM7SF2/CTH/GLRX/CXCR4/VLDLR/TRIB3/FDXR/PLOD2/DDIT4/PHGDH/STC1	0.33	0.16	0.28	Same
MTORC1_SIGNALING	CM9	Negative	Negative	-1.56438	194	-0.442592	-1.796	0.00135685	0.00865651	0.00437381	3748	PSMD14/MCM4/IGFBP5/CANX/TES/IDI1/ELOVL6/CACYBP/NFIL3/ATP5MC1/ALDOA/GCLC/GAPDH/DHCR24/SLC9A3R1/CYB5B/CD9/PSMC6/SSR1/ELOVL5/PPA1/SERPINH1/FGL2/RRM2/TFRC/HK2/CCNG1/TUBG1/SLC2A1/PGM1/PNP/EEF1E1/SQLE/UNG/STARD4/LDHA/ADD3/TPI1/ACLY/CTSC/SCD/FDXR/PHGDH/GBE1/HMGCS1/RIT1/PSPH/STC1/GLRX/P4HA1/CXCR4/GOT1/PIK3R3/TMEM97/PLOD2/PGK1/ENO1/PDK1/SHMT2/SYTL2/DDIT4/SLC37A4/AK4/EGLN3	0.33	0.2	0.27	Same
MYC_TARGETS_V1	CM38	Positive	Negative	-1.89767	184	0.550726	2.0533	0.0017331	0.00527649	0.00166626	4840	CDK2/PPIA/MCM4/AIMP2/CDC45/CYC1/CLNS1A/NOP16/CCT2/PA2G4/MCM7/XPOT/CDK4/MYC/GLO1/POLE3/HSP90AB1/EIF3D/PHB2/CCT5/MAD2L1/RANBP1/IMPDH2/STARD7/LSM2/C1QBP/SRPK1/SMARCC1/PABPC4/NHP2/MRPS18B/NOLC1/EIF3B/IARS1/TUFM/CANX/ABCE1/UBA2/TFDP1/SF3A1/PTGES3/GNL3/SLC25A3/NCBP2/POLD2/RUVBL2/CDC20/HSPD1/FAM120A/ETF1/HNRNPA1/DEK/GSPT1/DHX15/APEX1/RFC4/RRP9/SRSF3/H2AZ1/NCBP1/COPS5/SET/RNPS1/CCNA2/IFRD1/SERBP1/DDX21/C…	0.55	0.26	0.41	Opposite
MYC_TARGETS_V1	CM9	Negative	Positive	2.0533	184	-0.468945	-1.89767	0.00134228	0.00865651	0.00437381	5033	HNRNPD/PSMA4/SRSF7/PSMB3/ILF2/PSMD8/SMARCC1/PSMC4/SLC25A3/HSPD1/SF3A1/LSM2/CCT3/RUVBL2/SNRPB2/TRA2B/PSMB2/SNRPG/TXNL4A/ACP1/EIF4G2/PHB2/H2AZ1/NOLC1/TUFM/CCT7/PHB/AP3S1/CBX3/PSMD3/RPL18/PSMD14/EIF2S1/MCM4/CANX/STARD7/MCM7/HNRNPA3/SNRPD3/HNRNPA1/RPS5/PTGES3/HDGF/UBE2L3/BUB3/DDX21/SRSF3/PWP1/AIMP2/PRDX4/CDK2/PCBP1/NAP1L1/YWHAQ/CCT4/HDAC2/CCT2/MAD2L1/ODC1/NHP2/KARS1/SYNCRIP/UBA2/POLD2/SNRPD1/USP1/YWH…	0.54	0.27	0.39	Opposite
MYC_TARGETS_V2	CM38	Positive			55	0.658557	2.07287	0.00176991	0.00527649	0.00166626	3993	NOP2/MCM4/AIMP2/BYSL/NOP16/MYBBP1A/PA2G4/PPRC1/CDK4/UNG/PRMT3/DUSP2/MYC/TBRG4/PUS1/NOLC1/RRP12/PES1/WDR74/TCOF1/GNL3/NIP7/WDR43/HSPD1/RRP9/RCL1/GRWD1/TFB2M/NDUFAF4/SRM/MCM5/CBX3/FARSA/EXOSC5/SLC19A1	0.64	0.22	0.5
OXIDATIVE_PHOSPHORYLATION	CM38	Positive	Negative	-1.81632	186	0.464532	1.73394	0.00173913	0.00527649	0.00166626	4217	CYCS/NDUFC2/CS/ETFB/CYC1/AFG3L2/NQO2/UQCRB/NNT/MTRR/ATP5F1D/MRPS30/MRPL15/DECR1/ATP5F1B/NDUFA9/NDUFV1/NDUFS7/TOMM22/PHB2/OGDH/MPC1/ATP6V1E1/NDUFB7/HSPA9/LDHB/SLC25A4/NDUFS8/ATP5MC2/NDUFS6/COX6C/COX7A2/ATP5MC1/OPA1/NDUFA7/ATP6V1C1/SLC25A11/RHOT2/UQCR10/SLC25A5/IMMT/ATP6V1H/IDH3G/PMPCA/TIMM9/FH/NDUFB5/TIMM13/COX4I1/ACO2/POLR2F/UQCRQ/NDUFA8/MDH2/MRPL35/NDUFS3/SLC25A3/SDHA/ATP5F1A/UQCR11/UQCRC2/NDUFA…	0.49	0.23	0.38	Opposite
OXIDATIVE_PHOSPHORYLATION	CM9	Negative	Positive	1.73394	186	-0.449353	-1.81632	0.00135135	0.00865651	0.00437381	4836	ACO2/UQCR10/ATP5F1C/SLC25A3/COX7A2/IDH2/NDUFB6/COX4I1/NDUFB8/NDUFA2/MRPS22/MRPL35/MTX2/ECI1/ATP5PB/PHB2/ABCB7/COX7A2L/NDUFS2/UQCRQ/NDUFB3/SUCLG1/ETFA/IDH3B/NQO2/OAT/NDUFS6/TIMM13/UQCRB/NDUFB4/ETFB/ACADVL/ATP5MC1/COX8A/FDX1/COX15/RHOT1/ATP5PO/NDUFA9/ATP5MG/NDUFS4/PDHX/SDHC/ATP5F1B/HADHB/SUPV3L1/POLR2F/NDUFAB1/MGST3/HADHA/SDHB/SUCLA2/ECH1/DLAT/CASP7/CPT1A/VDAC3/HTRA2/ECHS1/NDUFC2/TIMM10/CYB5R3/TOMM…	0.46	0.26	0.34	Opposite
P53_PATHWAY	CM38	Negative			196	-0.375073	-1.49424	0.00475059	0.00881834	0.00278474	3161	HSPA4L/APP/EI24/PRMT2/BAX/PTPN14/PPP1R15A/PTPRE/SOCS1/GLS2/MXD1/SLC7A11/ZFP36L1/HRAS/DDB2/S100A10/DCXR/CTSD/ATF3/ALOX15B/FOS/SESN1/RHBDF2/VWA5A/RNF19B/TGFB1/IFI30/EPHX1/CGRRF1/RB1/LIF/SERTAD3/NINJ1/SAT1/OSGIN1/BTG2/CD82/H1-2/SLC35D1/HEXIM1/ADA/PMM1/PLK2/CYFIP2/PHLDA3/CDKN2A/ABAT/NUPR1/GADD45A/IER3/NDRG1/HMOX1/RGS16/FAS/JUN/CDKN1A/EPHA2/PROCR/TAP1/ZBTB16/CDKN2B/TRIB3/FDXR/PDGFA/DDIT4/F2R/DRAM1/INH…	0.35	0.17	0.29
PEROXISOME	CM38	Negative			103	-0.405821	-1.48213	0.00932401	0.0150387	0.00474907	3047	ECH1/ECI2/STS/ACSL4/HRAS/IDI1/ACOX1/FADS1/HSD3B7/CTBP1/PEX13/SERPINA6/DHCR24/CRAT/GNPAT/DIO1/FDPS/ACOT8/BCL10/SLC23A2/HSD17B11/PEX11A/HMGCL/MVP/ALDH1A1/ABCB1/CAT/SOD2/IDH1/SLC27A2/ACSL1/DHRS3/HAO2/TTR/CADM1	0.34	0.17	0.29
REACTIVE_OXYGEN_SPECIES_PATHWAY	CM38	Negative			48	-0.540238	-1.7422	0.00683371	0.0117823	0.00372071	3242	PRNP/PTPA/SELENOS/TXNRD2/LAMTOR5/G6PD/PFKP/PRDX4/MPO/HHEX/STK25/OXSR1/PRDX2/CDKN2D/GLRX2/NQO1/LSP1/CAT/SOD2/SRXN1/GCLM/GLRX/GPX3	0.48	0.18	0.4
SPERMATOGENESIS	CM38	Positive			135	0.397271	1.43841	0.017331	0.0262591	0.00829235	2407	IL13RA2/GAPDHS/TKTL1/PCSK1N/LDHC/ARL4A/RPL39L/TUBA3C/IL12RB2/TCP11/CCT6B/HSPA2/CCNB2/LPIN1/EZH2/YBX2/DPEP3/DBF4/POMC/IDE/CNIH2/MAP7/CSNK2A2/PHF7/CDKN3/PARP2	0.19	0.13	0.17
TNFA_SIGNALING_VIA_NFKB	CM38	Negative	Positive	1.35505	197	-0.603328	-2.40269	0.00238095	0.00527649	0.00166626	3220	TUBB2A/GPR183/TNFAIP6/PDLIM5/GADD45B/TLR2/DENND5A/MCL1/TNIP1/PPP1R15A/PTPRE/NFE2L2/RHOB/MXD1/MAP3K8/ICOSLG/IFNGR2/MAP2K3/FUT4/KLF6/PNRC1/ATF3/RELB/TNFRSF9/BIRC2/LDLR/FOS/SNN/RNF19B/INHBA/CXCL3/CD69/PFKFB3/IL6ST/IL15RA/CCND1/LIF/KLF9/NINJ1/MAFF/SAT1/BCL6/SERPINB8/CEBPD/SOCS3/PDE4B/CCRL2/BIRC3/CXCL6/BTG2/TRAF1/SLC16A6/DUSP1/BHLHE40/TNFAIP3/NFKBIA/FOSL1/LITAF/ZFP36/PLK2/ABCA1/CCL20/TNFAIP8/SDC4/NFAT…	0.54	0.18	0.45	Opposite
TNFA_SIGNALING_VIA_NFKB	CM9	Positive	Negative	-2.40269	197	0.289573	1.35505	0.0112782	0.0352444	0.0178077	1812	LAMB3/BCL2A1/PLAUR/CD44/IL18/GFPT2/SERPINE1/SLC16A6/GADD45B/G0S2/CEBPB/F3/PTX3/CCNL1/IL7R/PPP1R15A/CCL5/IL1B/TNFAIP2/TUBB2A/CXCL2/NINJ1/SLC2A6/TNFRSF9/KLF4/SPSB1/CLCF1/SPHK1/GADD45A/GCH1/IRF1/CSF1/CCRL2/MAP2K3/PLEK/GPR183/ZC3H12A/IL15RA/TRAF1/SERPINB2/ABCA1/NAMPT/SOCS3/CD80	0.22	0.1	0.2	Opposite
UV_RESPONSE_DN	CM9	Negative			143	-0.406712	-1.58988	0.0041841	0.0160927	0.00813104	3819	CDON/CITED2/MT1E/AGGF1/IGFBP5/PPARG/NRP1/BMPR1A/INPP4B/PDGFRB/CCN1/DLG1/NFKB1/ACVR2A/SRI/GRK5/SNAI2/COL1A2/NFIB/MGMT/MMP16/SLC22A18/CDKN1B/ATXN1/FBLN5/CDC42BPA/EFEMP1/PRKCE/NR3C1/SMAD7/AKT3/COL3A1/TGFBR3/MYC/LAMC1/TJP1/NEK7/RBPMS/PTEN/ADD3/BCKDHB/PMP22/TFPI/DAB2/ANXA4/APBB2/CAV1/ID1/KALRN/SDC2/DDAH1/PLPP3/IGF1R/PTPRM/PIK3R3/DLC1/GJA1/CAP2/MET/ADGRL2	0.42	0.21	0.34
XENOBIOTIC_METABOLISM	CM38	Negative			197	-0.533042	-2.12278	0.00238095	0.00527649	0.00166626	3409	XDH/GCKR/COMT/AP4B1/CASP6/ACOX3/ABCC2/PDLIM5/ECH1/IGFBP1/CYP2C18/IRF8/TNFRSF1A/CYP4F2/SLC12A4/CFB/HACL1/DHRS1/ASL/CYP1A1/FAH/ARPP19/DCXR/ACOX1/EPHX1/ACOX2/G6PC/ITIH4/UGDH/BCAT1/PGRMC1/SMOX/ENPEP/SERPINA6/TTPA/HPRT1/TPST1/NINJ1/VTN/PGD/VNN1/PAPSS2/MBL2/ETFDH/GSS/GNMT/SLC46A3/LEAP2/HRG/FETUB/LCAT/MAN1A1/SLC35D1/HGFAC/SLC22A1/AKR1C3/PMM1/TAT/TMEM176B/CYFIP2/PLG/ANGPTL3/F11/ITIH1/GAD1/NQO1/CYB5A/FABP…	0.5	0.19	0.41

## Sheet: TS6_HALLMARK_GSEA_shared
Probeset	ENTREZ	LocusLink	Symbol	CLINICALLY ACTIONABLE in DGIdb sources	GLYCOLYSIS (Higher in biopsies from Low sPDL1 patients)	FATTY_ACID_METABOLISM (Higher in biopsies from Low sPDL1 patients)	HYPOXIA (Higher in biopsies from Low sPDL1 patients)	MTORC1_SIGNALING (Higher in biopsies from Low sPDL1 patients)	ANDROGEN_RESPONSE (Higher in biopsies from Low sPDL1 patients)	KRAS_SIGNALING_DN (Higher in biopsies from High sPDL1 patients)
948_at	948	LOC948	CD36	FoundationOneGenes		CoreEnrichment_CM9_CM38
10397_at	10397	LOC10397	NDRG1	FoundationOneGenes|CarisMolecularIntelligence			CoreEnrichment_CM9_CM38		CoreEnrichment_CM9_CM38
6385_at	6385	LOC6385	SDC4	FoundationOneGenes|CarisMolecularIntelligence			CoreEnrichment_CM9_CM38
7422_at	7422	LOC7422	VEGFA	FoundationOneGenes|CarisMolecularIntelligence|Tempus	CoreEnrichment_CM9_CM38		CoreEnrichment_CM9_CM38
5163_at	5163	LOC5163	PDK1	FoundationOneGenes|CarisMolecularIntelligence|Tempus			CoreEnrichment_CM9_CM38	CoreEnrichment_CM9_CM38
7852_at	7852	LOC7852	CXCR4	FoundationOneGenes|Tempus	CoreEnrichment_CM9_CM38		CoreEnrichment_CM9_CM38	CoreEnrichment_CM9_CM38
54206_at	54206	LOC54206	ERRFI1	FoundationOneGenes|Tempus			CoreEnrichment_CM9_CM38
242_at	242	LOC242	ALOX12B	MskImpact|FoundationOneGenes						CoreEnrichment_CM9_CM38
595_at	595	LOC595	CCND1	MskImpact|FoundationOneGenes|CarisMolecularIntelligence|Oncomine|Tempus					CoreEnrichment_CM9_CM38
4214_at	4214	LOC4214	MAP3K1	MskImpact|FoundationOneGenes|CarisMolecularIntelligence|Tempus			CoreEnrichment_CM9_CM38
7128_at	7128	LOC7128	TNFAIP3	MskImpact|FoundationOneGenes|CarisMolecularIntelligence|Tempus			CoreEnrichment_CM9_CM38
6662_at	6662	LOC6662	SOX9	MskImpact|FoundationOneGenes|Tempus	CoreEnrichment_CM9_CM38
8821_at	8821	LOC8821	INPP4B	MskImpact|FoundationOneGenes|Tempus					CoreEnrichment_CM9_CM38
6016_at	6016	LOC6016	RIT1	MskImpact|Tempus				CoreEnrichment_CM9_CM38
54541_at	54541	LOC54541	DDIT4	#N/A	CoreEnrichment_CM9_CM38		CoreEnrichment_CM9_CM38	CoreEnrichment_CM9_CM38
2745_at	2745	LOC2745	GLRX	#N/A	CoreEnrichment_CM9_CM38		CoreEnrichment_CM9_CM38	CoreEnrichment_CM9_CM38
5033_at	5033	LOC5033	P4HA1	#N/A	CoreEnrichment_CM9_CM38		CoreEnrichment_CM9_CM38	CoreEnrichment_CM9_CM38
2542_at	2542	LOC2542	SLC37A4	#N/A	CoreEnrichment_CM9_CM38		CoreEnrichment_CM9_CM38	CoreEnrichment_CM9_CM38
6781_at	6781	LOC6781	STC1	#N/A	CoreEnrichment_CM9_CM38		CoreEnrichment_CM9_CM38	CoreEnrichment_CM9_CM38
229_at	229	LOC229	ALDOB	#N/A	CoreEnrichment_CM9_CM38		CoreEnrichment_CM9_CM38
51129_at	51129	LOC51129	ANGPTL4	#N/A	CoreEnrichment_CM9_CM38		CoreEnrichment_CM9_CM38
3486_at	3486	LOC3486	IGFBP3	#N/A	CoreEnrichment_CM9_CM38		CoreEnrichment_CM9_CM38
5165_at	5165	LOC5165	PDK3	#N/A	CoreEnrichment_CM9_CM38		CoreEnrichment_CM9_CM38
5214_at	5214	LOC5214	PFKP	#N/A	CoreEnrichment_CM9_CM38		CoreEnrichment_CM9_CM38
6383_at	6383	LOC6383	SDC2	#N/A	CoreEnrichment_CM9_CM38		CoreEnrichment_CM9_CM38
5352_at	5352	LOC5352	PLOD2	#N/A	CoreEnrichment_CM9_CM38			CoreEnrichment_CM9_CM38
375790_at	375790	LOC375790	AGRN	#N/A	CoreEnrichment_CM9_CM38
1528_at	1528	LOC1528	CYB5A	#N/A	CoreEnrichment_CM9_CM38
9653_at	9653	LOC9653	HS2ST1	#N/A	CoreEnrichment_CM9_CM38
4907_at	4907	LOC4907	NT5E	#N/A	CoreEnrichment_CM9_CM38
5351_at	5351	LOC5351	PLOD1	#N/A	CoreEnrichment_CM9_CM38
6676_at	6676	LOC6676	SPAG4	#N/A	CoreEnrichment_CM9_CM38
1718_at	1718	LOC1718	DHCR24	#N/A		CoreEnrichment_CM9_CM38		CoreEnrichment_CM9_CM38	CoreEnrichment_CM9_CM38
3157_at	3157	LOC3157	HMGCS1	#N/A		CoreEnrichment_CM9_CM38		CoreEnrichment_CM9_CM38	CoreEnrichment_CM9_CM38
3422_at	3422	LOC3422	IDI1	#N/A		CoreEnrichment_CM9_CM38		CoreEnrichment_CM9_CM38	CoreEnrichment_CM9_CM38
33_at	33	LOC33	ACADL	#N/A		CoreEnrichment_CM9_CM38
37_at	37	LOC37	ACADVL	#N/A		CoreEnrichment_CM9_CM38
6296_at	6296	LOC6296	ACSM3	#N/A		CoreEnrichment_CM9_CM38
216_at	216	LOC216	ALDH1A1	#N/A		CoreEnrichment_CM9_CM38
224_at	224	LOC224	ALDH3A2	#N/A		CoreEnrichment_CM9_CM38
8639_at	8639	LOC8639	AOC3	#N/A		CoreEnrichment_CM9_CM38
594_at	594	LOC594	BCKDHB	#N/A		CoreEnrichment_CM9_CM38
1579_at	1579	LOC1579	CYP4A11	#N/A		CoreEnrichment_CM9_CM38
1891_at	1891	LOC1891	ECH1	#N/A		CoreEnrichment_CM9_CM38
10455_at	10455	LOC10455	ECI2	#N/A		CoreEnrichment_CM9_CM38
2052_at	2052	LOC2052	EPHX1	#N/A		CoreEnrichment_CM9_CM38
2110_at	2110	LOC2110	ETFDH	#N/A		CoreEnrichment_CM9_CM38
2168_at	2168	LOC2168	FABP1	#N/A		CoreEnrichment_CM9_CM38
2819_at	2819	LOC2819	GPD1	#N/A		CoreEnrichment_CM9_CM38
2820_at	2820	LOC2820	GPD2	#N/A		CoreEnrichment_CM9_CM38
51179_at	51179	LOC51179	HAO2	#N/A		CoreEnrichment_CM9_CM38
26275_at	26275	LOC26275	HIBCH	#N/A		CoreEnrichment_CM9_CM38
3155_at	3155	LOC3155	HMGCL	#N/A		CoreEnrichment_CM9_CM38
3158_at	3158	LOC3158	HMGCS2	#N/A		CoreEnrichment_CM9_CM38
51170_at	51170	LOC51170	HSD17B11	#N/A		CoreEnrichment_CM9_CM38
3956_at	3956	LOC3956	LGALS1	#N/A		CoreEnrichment_CM9_CM38
4128_at	4128	LOC4128	MAOA	#N/A		CoreEnrichment_CM9_CM38
5793_at	5793	LOC5793	PTPRG	#N/A		CoreEnrichment_CM9_CM38
6281_at	6281	LOC6281	S100A10	#N/A		CoreEnrichment_CM9_CM38
57515_at	57515	LOC57515	SERINC1	#N/A		CoreEnrichment_CM9_CM38
8803_at	8803	LOC8803	SUCLA2	#N/A		CoreEnrichment_CM9_CM38
7358_at	7358	LOC7358	UGDH	#N/A		CoreEnrichment_CM9_CM38
7503_at	7503	LOC7503	XIST	#N/A		CoreEnrichment_CM9_CM38
2632_at	2632	LOC2632	GBE1	#N/A			CoreEnrichment_CM9_CM38	CoreEnrichment_CM9_CM38
6513_at	6513	LOC6513	SLC2A1	#N/A			CoreEnrichment_CM9_CM38	CoreEnrichment_CM9_CM38
133_at	133	LOC133	ADM	#N/A			CoreEnrichment_CM9_CM38
1356_at	1356	LOC1356	CP	#N/A			CoreEnrichment_CM9_CM38
8870_at	8870	LOC8870	IER3	#N/A			CoreEnrichment_CM9_CM38
4015_at	4015	LOC4015	LOX	#N/A			CoreEnrichment_CM9_CM38
56925_at	56925	LOC56925	LXN	#N/A			CoreEnrichment_CM9_CM38
23327_at	23327	LOC23327	NEDD4L	#N/A			CoreEnrichment_CM9_CM38
5105_at	5105	LOC5105	PCK1	#N/A			CoreEnrichment_CM9_CM38
5228_at	5228	LOC5228	PGF	#N/A			CoreEnrichment_CM9_CM38
123_at	123	LOC123	PLIN2	#N/A			CoreEnrichment_CM9_CM38
6095_at	6095	LOC6095	RORA	#N/A			CoreEnrichment_CM9_CM38
55076_at	55076	LOC55076	TMEM45A	#N/A			CoreEnrichment_CM9_CM38
23036_at	23036	LOC23036	ZNF292	#N/A			CoreEnrichment_CM9_CM38
6319_at	6319	LOC6319	SCD	#N/A				CoreEnrichment_CM9_CM38	CoreEnrichment_CM9_CM38
120_at	120	LOC120	ADD3	#N/A				CoreEnrichment_CM9_CM38
1075_at	1075	LOC1075	CTSC	#N/A				CoreEnrichment_CM9_CM38
80777_at	80777	LOC80777	CYB5B	#N/A				CoreEnrichment_CM9_CM38
79071_at	79071	LOC79071	ELOVL6	#N/A				CoreEnrichment_CM9_CM38
2232_at	2232	LOC2232	FDXR	#N/A				CoreEnrichment_CM9_CM38
10875_at	10875	LOC10875	FGL2	#N/A				CoreEnrichment_CM9_CM38
3099_at	3099	LOC3099	HK2	#N/A				CoreEnrichment_CM9_CM38
3488_at	3488	LOC3488	IGFBP5	#N/A				CoreEnrichment_CM9_CM38
5230_at	5230	LOC5230	PGK1	#N/A				CoreEnrichment_CM9_CM38
26227_at	26227	LOC26227	PHGDH	#N/A				CoreEnrichment_CM9_CM38
9368_at	9368	LOC9368	SLC9A3R1	#N/A				CoreEnrichment_CM9_CM38
134429_at	134429	LOC134429	STARD4	#N/A				CoreEnrichment_CM9_CM38
26136_at	26136	LOC26136	TES	#N/A				CoreEnrichment_CM9_CM38
9510_at	9510	LOC9510	ADAMTS1	#N/A					CoreEnrichment_CM9_CM38
2773_at	2773	LOC2773	GNAI3	#N/A					CoreEnrichment_CM9_CM38
3856_at	3856	LOC3856	KRT8	#N/A					CoreEnrichment_CM9_CM38
3998_at	3998	LOC3998	LMAN1	#N/A					CoreEnrichment_CM9_CM38
5238_at	5238	LOC5238	PGM3	#N/A					CoreEnrichment_CM9_CM38
5867_at	5867	LOC5867	RAB4A	#N/A					CoreEnrichment_CM9_CM38
54407_at	54407	LOC54407	SLC38A2	#N/A					CoreEnrichment_CM9_CM38
79689_at	79689	LOC79689	STEAP4	#N/A					CoreEnrichment_CM9_CM38
3860_at	3860	LOC3860	KRT13	#N/A						CoreEnrichment_CM9_CM38
5055_at	5055	LOC5055	SERPINB2	#N/A						CoreEnrichment_CM9_CM38
6707_at	6707	LOC6707	SPRR3	#N/A						CoreEnrichment_CM9_CM38
57451_at	57451	LOC57451	TENM2	#N/A						CoreEnrichment_CM9_CM38
7032_at	7032	LOC7032	TFF2	#N/A						CoreEnrichment_CM9_CM38

## Sheet: TS7_MMPs_limma_bl_bl
Symbol	Probeset	ENTREZ	LocusLink	logFC_CM9	AveExpr_CM9	t_CM9	P.Value_CM9	logFC_CM38	AveExpr_CM38	t_CM38	P.Value_CM38
ADAM18	8749_at	8749	LOC8749	0.0466	2.3137	2.2446	0.0285	-0.0135994	3.01343	-1.49741	0.141482
ADAM21	8747_at	8747	LOC8747	0.0895	2.865	2.8215	0.0065	-0.0528543	3.83936	-1.29416	0.202415
ADAM8	101_at	101	LOC101	0.1012	3.933	2.6068	0.0115	-0.0507115	3.8977	-1.08906	0.282103
ADAMTS19	171019_at	171019	LOC171019	0.0112	2.0379	0.678	0.5004	-0.0292153	3.17693	-1.01431	0.316021
MMP12	4321_at	4321	LOC4321	0.4106	4.4766	1.5911	0.1169	-0.269007	6.03409	-0.929014	0.35799
MMP1	4312_at	4312	LOC4312	0.0024	3.6699	0.0158	0.9874	-0.218432	5.27089	-0.79888	0.428684
ADAMTS16	170690_at	170690	LOC170690	0.0298	4.6361	0.3686	0.7137	-0.0426372	3.42077	-0.779651	0.439802
ADAMTS12	81792_at	81792	LOC81792	-0.0078	3.9433	-0.0752	0.9403	-0.0109469	3.0668	-0.741064	0.462622
ADAMTS9	56999_at	56999	LOC56999	-0.137	4.098	-2.1372	0.0367	-0.0680601	4.22334	-0.728653	0.470104
ADAM17	6868_at	6868	LOC6868	0.0372	6.6812	0.8868	0.3788	-0.0264533	6.26207	-0.72793	0.470542
ADAMTS18	170692_at	170692	LOC170692	0.0196	2.3411	0.6559	0.5144	-0.0198886	3.34682	-0.661482	0.511779
MMP14	4323_at	4323	LOC4323	0.0468	5.5213	0.6317	0.53	-0.0404378	8.00555	-0.623001	0.536524
ADAMTS4	9507_at	9507	LOC9507	-0.0627	4.1846	-0.8127	0.4197	-0.0316348	4.14502	-0.60048	0.551291
ADAM22	53616_at	53616	LOC53616	0.0158	3.9481	0.1645	0.8699	-0.0125013	2.96	-0.595261	0.554742
ADAM9	8754_at	8754	LOC8754	-0.0509	8.3325	-0.7475	0.4577	-0.0472151	7.48327	-0.564119	0.575559
ADAM7	8756_at	8756	LOC8756	0.0222	2.4805	0.7976	0.4283	-0.00702519	3.37423	-0.45284	0.652906
ADAMTS6	11174_at	11174	LOC11174	0.0982	2.2797	2.4548	0.0171	-0.0137167	3.43055	-0.440978	0.661405
MMP15	4324_at	4324	LOC4324	-0.006	2.8636	-0.2014	0.8411	-0.0184926	3.57395	-0.416157	0.679334
MMP25	64386_at	64386	LOC64386	0.0479	2.6332	1.399	0.167	-0.0175337	3.44889	-0.407567	0.685583
ADAM15	8751_at	8751	LOC8751	-0.0243	4.3092	-0.6268	0.5332	-0.0256346	5.39225	-0.387601	0.700195
MMP20	9313_at	9313	LOC9313	0.0113	2.2787	0.4419	0.6602	-0.00794447	3.31325	-0.385919	0.701431
ADAMTS5	11096_at	11096	LOC11096	-0.0666	5.2688	-0.4781	0.6344	-0.0448756	5.0347	-0.36151	0.719462
ADAMTS1	9510_at	9510	LOC9510	-0.0813	8.164	-0.8888	0.3777	-0.0371136	6.90759	-0.279126	0.781466
MMP13	4322_at	4322	LOC4322	0.1109	2.7517	0.6501	0.5181	-0.0414514	3.70652	-0.278006	0.78232
MMP19	4327_at	4327	LOC4327	0.1175	5.4297	1.3902	0.1697	-0.0113172	4.18766	-0.230457	0.818813
MMP9	4318_at	4318	LOC4318	0.2214	6.1721	1.0511	0.2975	-0.0355879	8.54807	-0.162373	0.871761
ADAM19	8728_at	8728	LOC8728	0.0411	4.2052	0.7628	0.4486	-0.00289344	3.65652	-0.11506	0.908925
MMP21	118856_at	118856	LOC118856	0.061	2.9786	1.1609	0.2504	-0.00172387	3.03707	-0.11195	0.911376
ADAM28	10863_at	10863	LOC10863	0.0791	6.285	0.9123	0.3653	-0.00303967	4.33311	-0.036834	0.970785
MMP16	4325_at	4325	LOC4325	-0.0659	3.2475	-0.832	0.4088	-0.00271766	3.89257	-0.0218219	0.982689
ADAM2	2515_at	2515	LOC2515	0.0128	2.1773	0.5952	0.554	0.00149774	2.95286	0.0882623	0.930072
MMP24	10893_at	10893	LOC10893	0.0017	4.6695	0.0319	0.9747	0.00186619	3.17993	0.153209	0.878939
MMP8	4317_at	4317	LOC4317	0.0487	2.0512	1.1723	0.2458	0.018356	3.55007	0.179054	0.858724
ADAMTS20	80070_at	80070	LOC80070	0.0065	1.9302	0.264	0.7927	0.00266807	3.18418	0.182765	0.855829
ADAM29	11086_at	11086	LOC11086	0.0378	2.0147	1.3884	0.1702	0.00413645	3.16755	0.259244	0.796666
MMP10	4319_at	4319	LOC4319	-0.0101	2.186	-0.4327	0.6668	0.0264062	2.99773	0.259667	0.796341
ADAMTS17	170691_at	170691	LOC170691	-0.0072	2.3766	-0.2286	0.82	0.032594	4.22211	0.306113	0.760974
ADAM10	102_at	102	LOC102	-0.0529	6.2628	-0.848	0.3998	0.0297811	6.61318	0.347114	0.730173
ADAMTS7	11173_at	11173	LOC11173	0.0498	3.774	1.3925	0.169	0.0124971	3.06041	0.44915	0.655545
ADAMTS10	81794_at	81794	LOC81794	0.0698	2.4702	2.7167	0.0086	0.00651624	2.77609	0.469561	0.641005
ADAM30	11085_at	11085	LOC11085	0.0168	2.7122	0.5519	0.5831	0.0119099	3.48843	0.484417	0.630511
ADAMTS2	9509_at	9509	LOC9509	-0.003	3.6626	-0.03	0.9762	0.0523733	3.8555	0.691111	0.493154
ADAMTS8	11095_at	11095	LOC11095	0.0146	2.8822	0.4401	0.6615	0.0249912	2.99209	0.693195	0.491859
MMP7	4316_at	4316	LOC4316	-0.3926	4.9629	-1.3378	0.1861	0.157057	4.35718	0.70427	0.485004
ADAMTS15	170689_at	170689	LOC170689	0.0724	3.2994	2.7676	0.0075	0.0144726	3.41218	0.705196	0.484433
MMP2	4313_at	4313	LOC4313	0.08	6.6751	0.5883	0.5586	0.116335	6.13677	0.75402	0.454884
MMP27	64066_at	64066	LOC64066	0.0441	2.3711	1.6745	0.0993	0.0364236	3.18673	0.834506	0.408539
MMP3	4314_at	4314	LOC4314	0.0434	2.6735	0.3013	0.7642	0.15902	3.95482	0.83923	0.405912
MMP28	79148_at	79148	LOC79148	0.0416	2.6171	1.3342	0.1872	0.0303994	3.73127	0.843505	0.403544
ADAM33	80332_at	80332	LOC80332	0.0508	2.9713	1.5326	0.1307	0.0157094	3.66105	0.846884	0.401678
ADAMTS3	9508_at	9508	LOC9508	0.0079	3.1843	0.1264	0.8999	0.106049	3.67916	0.893073	0.376714
MMP26	56547_at	56547	LOC56547	0.0028	2.1681	0.1543	0.8779	0.0157646	3.0375	0.936413	0.354211
MMP11	4320_at	4320	LOC4320	-0.0059	3.2882	-0.1023	0.9189	0.0846499	5.15261	1.03206	0.307727
ADAM12	8038_at	8038	LOC8038	-0.0716	4.6915	-0.6374	0.5264	0.055103	3.77168	1.22123	0.228554
MMP17	4326_at	4326	LOC4326	0.0904	3.7905	2.7134	0.0087	0.138271	5.39448	1.29584	0.201838
ADAM23	8745_at	8745	LOC8745	-0.0321	2.9824	-0.5178	0.6065	0.212332	5.21848	1.39257	0.170801
ADAMTS13	11093_at	11093	LOC11093	0.0646	2.8637	3.0355	0.0036	0.0506521	3.90111	1.41939	0.162885
ADAM20	8748_at	8748	LOC8748	0.0538	2.3345	1.6394	0.1064	0.0264223	3.06045	1.57448	0.122596
ADAM11	4185_at	4185	LOC4185	0.0344	2.6496	1.7485	0.0856	0.0353309	3.13059	1.94599	0.0581101
ADAMTS14	140766_at	140766	LOC140766	0.0385	2.4756	1.8275	0.0727	0.0465347	3.3618	2.29556	0.0265635
MMP23A	NA	NA	NA	NA	NA	NA	NA	NA	NA	NA	NA
MMP23B	NA	8510	LOC8150	NA	NA	NA	NA	NA	NA	NA	NA
ADAM1	NA	NA	NA	NA	NA	NA	NA	NA	NA	NA	NA

## Sheet: TS8_CM9_Corr_chg_chg
Biomarker	p.value_pearson	Cor_pearson	p.value_spearman	Cor_spearman	p.value_kendall	Cor_kendall
CS_DIFF.B_cell_naive	0.251	-0.24	0.163	-0.29	0.218	-0.18
CS_DIFF.B_cell_memory	0.607	-0.13	0.888	-0.04	1	-0.01
CS_DIFF.B_cell_plasma	0.232	0.2	0.661	0.07	0.594	0.06
CS_DIFF.T_cell_CD8	0.662	0.07	0.757	0.05	0.846	0.02
CS_DIFF.T_cell_CD4_memory_resting	0.645	0.11	0.792	0.06	0.924	0.02
CS_DIFF.T_cell_CD4_memory_activated	0.96	-0.02	0.989	-0.01	1	-0.02
CS_DIFF.T_cell_follicular_helper	0.835	-0.04	0.781	0.05	0.726	0.04
CS_DIFF.T_cell_regulatory	0.619	0.1	0.657	0.09	0.694	0.06
CS_DIFF.T_cell_gamma_delta	0.96	-0.01	0.89	-0.02	0.882	-0.02
CS_DIFF.NK_cell_activated	0.647	-0.08	0.905	-0.02	0.948	-0.01
CS_DIFF.Monocyte	0.923	-0.02	0.638	0.1	0.627	0.07
CS_DIFF.Macrophage_M0	0.473	-0.18	0.348	-0.23	0.41	-0.15
CS_DIFF.Macrophage_M1	0.698	-0.07	0.707	-0.06	0.706	-0.05
CS_DIFF.Macrophage_M2	0.949	-0.01	0.401	-0.14	0.398	-0.1
CS_DIFF.Myeloid_dendritic_cell_resting	0.601	-0.1	0.359	-0.18	0.317	-0.14
CS_DIFF.Myeloid_dendritic_cell_activated	0.885	-0.04	0.723	0.11	0.765	0.08
CS_DIFF.Mast_cell_activated	0.824	-0.07	0.964	0.02	0.914	-0.03
CS_DIFF.Mast_cell_resting	0.139	0.26	0.377	0.15	0.323	0.12
CS_DIFF.Eosinophil	0.864	-0.05	0.669	-0.13	0.675	-0.1
CS_DIFF.Neutrophil	0.164	-0.23	0.076	-0.3	0.077	-0.2

## Sheet: TS9_CM38_Corr_chg_chg
Biomarker	p.value_pearson	Cor_pearson	p.value_spearman	Cor_spearman	p.value_kendall	Cor_kendall
CS_DIFF.B_cell_naive	0.907	-0.04	0.576	0.19	0.761	0.09
CS_DIFF.B_cell_memory	0.82	0.05	0.781	-0.06	0.729	-0.05
CS_DIFF.B_cell_plasma	0.531	0.13	0.706	0.08	0.727	0.05
CS_DIFF.T_cell_CD8	0.659	0.09	0.762	0.06	0.597	0.07
CS_DIFF.T_cell_CD4_memory_resting	0.684	-0.17	0.935	-0.05	1	0
CS_DIFF.T_cell_CD4_memory_activated	0.516	-0.13	0.354	-0.18	0.341	-0.13
CS_DIFF.T_cell_follicular_helper	0.907	-0.02	0.655	-0.09	0.799	-0.04
CS_DIFF.T_cell_regulatory	0.716	0.11	0.835	0.07	0.858	0.05
CS_DIFF.T_cell_gamma_delta	0.719	-0.07	0.776	-0.06	0.71	-0.05
CS_DIFF.NK_cell_activated	0.575	0.11	0.531	0.12	0.652	0.06
CS_DIFF.Monocyte	0.361	0.2	0.406	0.19	0.402	0.13
CS_DIFF.Macrophage_M0	0.68	0.08	0.505	0.13	0.535	0.09
CS_DIFF.Macrophage_M1	0.463	0.14	0.553	0.12	0.493	0.1
CS_DIFF.Macrophage_M2	0.813	-0.05	0.507	-0.13	0.493	-0.1
CS_DIFF.Myeloid_dendritic_cell_resting	0.576	-0.11	0.651	-0.09	0.57	-0.08
CS_DIFF.Myeloid_dendritic_cell_activated	0.854	-0.09	0.662	0.21	0.773	0.14
CS_DIFF.Mast_cell_activated	0.869	-0.03	0.955	0.01	0.945	0.01
CS_DIFF.Mast_cell_resting	0.755	0.09	0.671	0.13	0.667	0.1
CS_DIFF.Eosinophil	0.707	-0.1	0.701	-0.1	0.776	-0.06
CS_DIFF.Neutrophil	0.546	-0.15	0.193	-0.31	0.267	-0.19

## Sheet: TS10_CM9_Corr_chg_bl
Biomarker	p.value_pearson	Cor_pearson	p.value_spearman	Cor_spearman	p.value_kendall	Cor_kendall
IM150_Angio.Score	0.386	0.13	0.313	0.15	0.265	0.11
IM150_MyeloidInfl.Score	0.017	0.35	0.018	0.35	0.03	0.22
IM150_Teff.Score	0.65	-0.07	0.427	-0.12	0.499	-0.07
TIS	0.733	-0.05	0.554	-0.09	0.648	-0.05
Javelin.Score	0.958	-0.01	0.815	-0.03	0.898	-0.01
EMTstroma.Score	0.225	0.18	0.13	0.22	0.176	0.14
CS_pre.B_cell_naive	0.363	0.14	0.254	0.17	0.21	0.13
CS_pre.B_cell_memory	0.479	-0.11	0.444	-0.11	0.446	-0.09
CS_pre.B_cell_plasma	0.062	-0.27	0.94	-0.01	0.985	0
CS_pre.T_cell_CD8+	0.801	-0.04	0.927	-0.01	0.985	0
CS_pre.T_cell_gamma_delta	0.119	-0.23	0.104	-0.24	0.127	-0.15
CS_pre.NK_cell_activated	0.128	-0.23	0.018	-0.34	0.013	-0.25
CS_pre.Monocyte	0.016	0.35	0.246	0.17	0.236	0.13
CS_pre.Macrophage_M0	0.273	0.16	0.215	0.18	0.189	0.15
CS_pre.Macrophage_M1	0.956	-0.01	0.489	-0.1	0.572	-0.06
CS_pre.Macrophage_M2	0.503	-0.1	0.95	0.01	0.985	0
CS_pre.Myeloid_dendritic_cell_resting	0.955	-0.01	0.417	0.12	0.397	0.09
CS_pre.Myeloid_dendritic_cell_activated	0.439	0.12	0.837	0.03	0.848	0.02
CS_pre.Mast_cell_activated	0.772	0.04	0.922	-0.01	0.85	-0.02
CS_pre.Mast_cell_resting	0.373	0.13	0.308	0.15	0.325	0.1
CS_pre.Neutrophil	0.004	0.41	0.009	0.38	0.007	0.27
CS_pre.CD4.T.cell	0.401	-0.13	0.582	-0.08	0.729	-0.04

[truncated: 1 more sheets: TS11_CM38_Corr_chg_bl]
